# Supplementary material for: Urine and serum metabolic profiling combined with machine learning for autoimmune disease discrimination and classification
Source: Royal Society of Chemistry journal article supplement (doi:10.1039/d3cc01861j), 2023-01-01
Supplement: d3cc01861j1.pdf [file d3cc01861j1.pdf]

## Supplementary Material for

### Urine and serum metabolic profiling combines machine learning for autoimmune diseases discrimination and classification

Qiuyao Du<sup>1,2</sup>, Xiao Wang<sup>1,2</sup>, Junyu Chen<sup>1,2</sup>, Caiqiao Xiong<sup>1,2</sup>, Wenlan Liu<sup>3</sup>, Jianfeng Liu<sup>4</sup>, Huihui Liu<sup>1,2\*</sup>, Lixia Jiang<sup>4\*</sup> & Zongxiu Nie<sup>1,2\*</sup>

<sup>1</sup>Beijing National Laboratory for Molecular Sciences, Key Laboratory of Analytical Chemistry for Living Biosystems, Institute of Chemistry, Chinese Academy of Sciences, Beijing 100190, China.

<sup>2</sup>University of Chinese Academy of Sciences, Beijing 100049, China.

<sup>3</sup>The Center for Medical Genetics & Molecular Diagnosis, Shenzhen Second People's Hospital/the First Affiliated Hospital of Shenzhen University Health Sciences Center, Shenzhen 518035, China.

<sup>4</sup>Department of Laboratory Medicine, First Affiliated Hospital of Gannan Medical University, Ganzhou, Jiangxi Province 341000, China.

Correspondence should be addressed to Huihui Liu; hhliu@iccas.ac.cn, Lixia Jiang; jlx7310@gmu.edu.cn and Zongxiu Nie; znie@iccas.ac.cn

This part included:

Materials and methods

Author contributions

Conflict of interest

Acknowledgements

Figures S1-S22

Tables S1-S18

References

## Materials and methods

### Biological samples

This study complied with the ethical standards formulated by the Hospital Scientific Research Ethics Committee of First Affiliated Hospital of Gannan Medical University (the serial number of the approval is LLSC-2021071301), and obtained the subject's informed consent. Urine and serum samples were collected from 247 subjects included 127 healthy controls (HC) and 120 patients with autoimmune diseases (ADs) in 2 mL centrifuge tubes and stored in a fridge at -80 °C. After excluding 84 individuals (65 HC and 19 ADs), the remaining samples were used for discriminant analysis. The gender and age distribution of the study participants were listed in Table S1. A two-tailed student's t-test was applied for age comparisons between two groups, and the obtained p value was  $0.484 > 0.05$ . To assess differences across the gender, a chi-squared test was used and resulting in a p-value of  $0.077 > 0.05$ . The results indicated that there were no statistically significant differences in the age and gender of the subjects.

### Chemicals

N-(1-naphthyl)ethylenediamine dihydrochloride (NEDC) was supplied by Sigma-Aldrich (St Louis, MO, USA). Uric acid, 2,5-dihydroxybenzoic acid (DHB) and 1-naphthylhydrazine hydrochloride (NHHC) were provided by J&K (Beijing, China). Graphdiyne (GD), cubic boron nitride (c-BN) and hexagonal boron nitride (h-BN) were purchased from Xianfeng Nanotechnology Corporation (Nanjing, China). Glucose was obtained from Sinopharm Chemical Reagent Co., Ltd (Shanghai, China). 3-chloro-L-phenylalanine was provided by Aladdin Biochemical Technology Co., Ltd (Shanghai, China). D-glucose-1,2-<sup>13</sup>C<sub>2</sub> was purchased from Cambridge Isotope Laboratories Inc (USA). Methanol, ethanol, acetonitrile and trifluoroacetic acid (TFA) were obtained from Fisher Scientific (USA). The water used was prepared by a Milli-Q water purification system from Millipore (Milford, MA, USA).

### Standard solutions

0.1 mg/mL and 0.05 mg/mL GD, 0.25 mg/mL c-BN and h-BN were prepared by dissolving them in deionized water. NHHC were prepared at the concentrations of 10 mg/mL in 50% methanol aqueous solution. 10 mg/mL NEDC was prepared by dissolving in 30% ethanol aqueous solution. DHB was prepared at the concentration of 10 mg/mL in 50% acetonitrile aqueous solution which containing 0.1% TFA. 3-chloro-L-phenylalanine was prepared at the concentration of 10 mmol/L in 50% methanol aqueous solution and used as the internal standard in urine samples. A series of uric acid standard solutions were prepared with concentration ratios of uric acid / 3-chloro-L-phenylalanine at 0.030, 0.038, 0.045, 0.075, 0.090 and 0.120. 5 mmol/L D-glucose-1,2-<sup>13</sup>C<sub>2</sub> aqueous solution was used as the internal standard in serum samples and series glucose standard solutions with concentration ratios of glucose / D-glucose-1,2-<sup>13</sup>C<sub>2</sub> at 0.16, 0.24, 0.40, 0.48, 0.80 and 2.00 were prepared. The solutions were stored at 4°C in darkness.

### Sample preparation

For serum samples, acetonitrile was added at a ratio of 1:2 to a 10 µL serum sample

to precipitate proteins. The supernatant was collected for matrix-assisted laser desorption/ionization mass spectrometry (MALDI-MS) analysis. Urine samples are not subjected to any pretreatment. Equal volumes (1  $\mu$ L) of the serum supernatant or urine sample, internal standard solution and matrix solution (NEDC) were mixed and 1  $\mu$ L of the resulting solution was deposited on the MALDI target plate and air-dried for further MS analysis. Quality control (QC) samples were prepared by combining equal volumes of all the urine or serum samples separately and then prepared as described above for instrumental analysis. QC samples were analyzed every six samples of the sequence to stabilize instrument performance and adjust signal drift between samples. Three mass spectra were acquired from independent experiments for each sample. The overall performance of the mass spectrometer was checked in every experiment using an oligosaccharides standard (D-glucose (MW: 180.16), maltose (MW: 342.30), 1-kestose (MW: 504.4), nystose (MW: 666.6), 1,1,1-kestopentaose (MW: 828.7), fructo-oligosaccharide DP6 (MW: 990.86)) before each run.

#### **MALDI-Time-of-flight (TOF) MS analysis**

MALDI-TOF MS analysis was performed in reflection negative mode using a Bruker Ultraflex extreme mass spectrometer (Bruker Daltonics, Billerica, Germany) equipped with a 355 nm smart beam Nd:YAG pulsed laser, within a mass range of 0-1000 Da. Each mass spectrum was obtained as an average of 200 laser shots at 500 Hz, and the laser size and laser power energy were set to ultra and 50% respectively.

#### **MALDI-Fourier transform ion cyclotron resonance (FTICR) MS analysis**

MALDI-FTICR MS analysis was performed with a Bruker 15 T Solarix FTICR mass spectrometer (Bruker Daltonics, Billerica, Germany) equipped with a 355 nm smart beam Nd:YAG pulsed laser. Metabolite identification was achieved by comparing high-resolution MS spectra with the online metabolomic databases: The Human Metabolome Database (HMDB, <https://www.hmdb.ca/>).

#### **High performance liquid chromatography (HPLC) MS/MS analysis**

HPLC-MS/MS analysis was performed on a 1260 HPLC instrument (Agilent Technologies, Palo Alto, CA, USA) and a Bruker Impact HD Q-TOF mass spectrometer (Bruker Daltonics, Billerica, Germany). A ZORBAX Eclipse Plus C18 column (100  $\times$  4.6 mm, 3.5  $\mu$ m) was used for the separation of analytes.

#### **Statistical analysis**

MALDI-MS data processing was performed using flexAnalysis 3.4 software with the signal to noise (S/N) of peaks over three. Peak normalized was performed on home-built code in Python 3.7. Specifically, urine and serum samples were collected from 247 subjects. After excluding 84 individuals (age and gender comparisons), 62 HC and 101 patients with ADs were included for subsequent analyses. The collected urine and serum samples were separately mixed with matrix and internal standard (IS) according to the above steps and subsequently entered the mass spectrometer for analysis. Each sample was tested 3 times in parallel. During the machine learning process, we randomly separate the dataset into train sets and test sets by samples rather than mass spectra. Due to the closeness of the replicate features, three replicate mass spectra from the same sample source were placed in the same dataset (training set or test set) to prevent inflated accuracy. A total of 489 mass spectra collected were summarized and

m/z were aligned. And all the intensities were normalized using the signal intensity of IS. The number of occurrences of each m/z in all spectra was calculated, and those less than 326 (489\*2/3) were eliminated. Subsequently, the matrix background was checked and tested 30 times in parallel, and the m/z features with the top eight highest abundance were eliminated, and then 551 and 441 m/z features of urine and serum samples were obtained respectively, which were used as a basis for subsequent statistical analysis. Unless otherwise stated, data were acquired from at least three independent experiments. Machine learning (ML) was carried out with the Orange 3.31.1 module in Python 3.7. The build-in classifier neural network (NN), random forest (RF), logistic regression (LR), naive bayes (NB), support vector machine (SVM), adaboost (AB) and k-nearest neighbor (kNN) were applied and evaluated by leave one out cross-validation, and build-in FreeViz was used for data visualization. The accuracy, specificity, F1, precision and recall combined with the visualized receiver operating characteristic (ROC) curve were used to evaluate the classification model. Model parameters were set as follows: NN: Hidden layers: 100, Activation: ReLu, Solver: Adam, Alpha: 0.0001, Max iterations: 200, Replicable training: True. RF: Number of trees: 10, Maximal number of considered features: unlimited, Replicable training: No, Maximal tree depth: unlimited, Stop splitting nodes with maximum instances: 5. LR: Regularization: Ridge (L2), C=1, class weights=False. NB: No additional parameter settings are performed. SVM: SVM type: SVM, C=1.0,  $\epsilon=0.1$ , Kernel: RBF,  $\exp(-\text{auto}|x-y|^2)$ , Numerical tolerance: 0.001, Iteration limit: 100. AB: Base estimator: tree, Number of estimators: 50, Algorithm (classification): Samme.r, Loss (regression): Linear. kNN: Number of neighbours: 5, Metric: Euclidean, Weight: Uniform. The confusion matrix and violin diagram were drawn by Origin 2022. The principal component analysis (PCA), partial least squares discriminant analysis (PLS-DA), sparse partial least squares discriminant analysis (sPLS-DA) and orthogonal partial least squares discriminant analysis (OPLS-DA) were performed using the MetaboAnalyst 5.0 at <https://www.metaboanalyst.ca/>. The heatmap and clustering correlation heatmap with signs were performed using the OmicStudio tools at <https://www.omicstudio.cn/>.

Discrimination between individual ADs (RA, SLE, AS, SS, excepting SSc and CTD with small sample sizes) and HC were conducted. Imbalanced class designs will have an impact on the performance of the classifier. Therefore, a down-sampling scheme was applied to account for differences in the number of participants between the groups. In each pairwise analysis, the dominant class was randomly subsampled (without replacement) to the same scale as the minority class. Generally, pairwise models of RA vs HC, SLE vs HC, AS vs HC, and SS vs HC exhibited high classification accuracy for both urine and serum (AUC of 0.952 - 0.998 and accuracy of 90.5% - 97.9% for NN, Tables S10 and S11). ROC curves and confusion matrix for NN were shown in Figure S14. FreeViz is an intelligent multivariate visualization approach<sup>1</sup>. Classification diagrams obtained from FreeViz were shown in Figure S15. MALDI-MS could provide important clues for potential small-molecule biomarkers. In each pairwise model of AD vs HC, top 10 discriminative m/z features were selected by FreeViz, respectively. The violin plot features were generated for visualization of the distribution differences among four types of ADs as well as HC (Figure S16)<sup>2</sup>. The

above results suggested that there were significant metabolic differences between diseased and healthy samples.

On account of the high number of patients with RA, it is critical to differentiate various ADs from RA. Machine learning classifiers mentioned above were conducted to distinguish the pairwise models. For SLE vs RA, AS vs RA and SS vs RA, NN achieved prominent discrimination in both urine and serum samples. Afterwards, we put the samples of 5 diseases (SLE, AS, SS, SSc and CTD) together to form the other diseases (OT) group, which was carried out for the classification with RA. NN enabled an AUC score of 0.956 and accuracy of 88.5% in urine samples, while AUC of 0.863 and accuracy of 77.4% in serum samples. However, when came to the classification model of OT (5) vs RA vs HC, the AUC and accuracy were raised to 0.947 and 83.2% of NN in serum samples. As for the classification model among four diseases SS vs AS vs SLE vs RA, the AUC and accuracy of NN in serum samples only reached 0.873 and 67.9%, respectively. Meanwhile, excellent classification results were obtained for all models in urine samples by NN (Figure S17, Tables S12 and S13).

### **Author contributions**

Z.N. planned and designed this work, and developed the overall approach. Q.D. performed the experiments and wrote the manuscript. H.L. optimized the experimental protocols. L.J., W.L. and J.L. helped with sample collection. X.W. and J.C. contributed to the data analysis. C.X. helped complete the experiments. All authors joined in the critical discussion and edited the manuscript.

### **Conflict of interest**

The authors declare that they have no known competing financial interests or personal relationships that could have appeared to influence the work reported in this paper.

### **Acknowledgements**

This work was supported by grants from the National Natural Science Foundation of China (Grant Nos. 21625504, 21827807, and 21790390/21790392), the Chinese Academy of Sciences and Shenzhen Science and Technology Innovation Commission (Grant No. JCYJ20210324115601005).

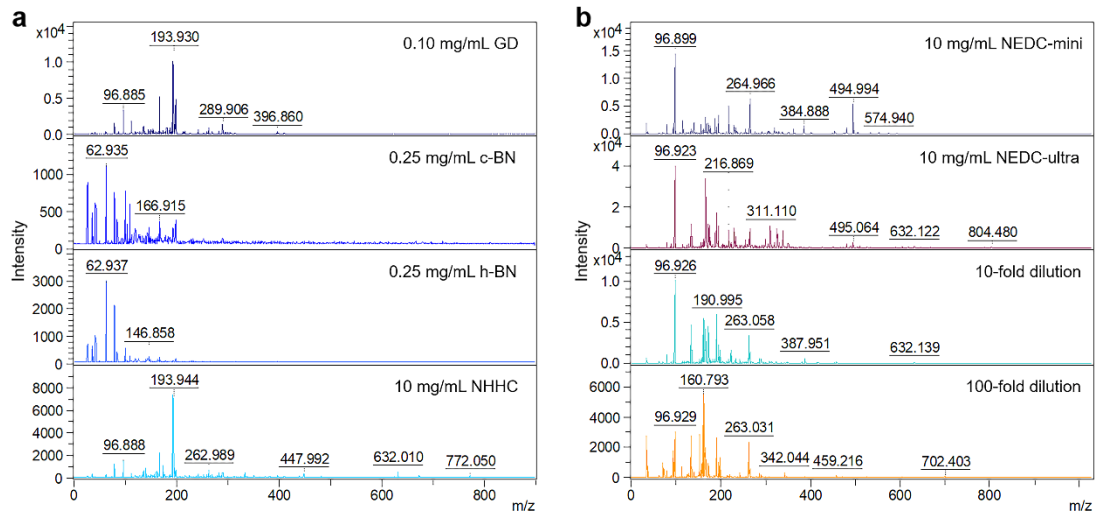

**Fig. S1** Mass spectra of urine samples by MALDI-MS. **a** 0.01 mg/mL GD, 0.25 mg/mL c-BN, 0.25 mg/mL h-BN and 10 mg/mL NHHC were used as matrices. **b** 10 mg/mL NEDC was used as matrix in different spot sizes (minimum and ultra) of laser, and urine samples were diluted 10-fold and 100-fold.

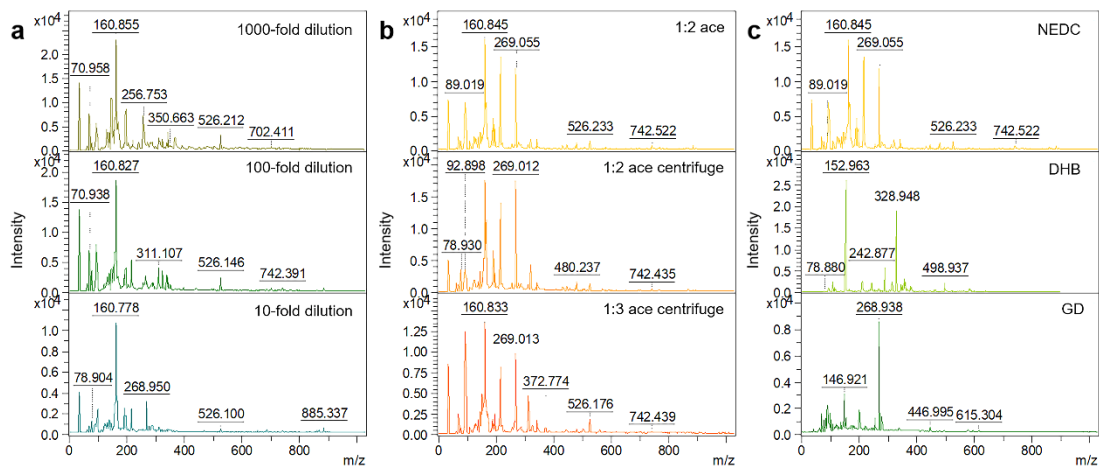

**Fig. S2** Mass spectra of serum samples by MALDI-MS. **a** Serum samples were diluted 1000-fold, 100-fold and 10-fold. **b** Acetonitrile was added at a ratio of 1:2, centrifugation was conducted after acetonitrile was added at a ratio of 1:2 and 1:3. **c** NEDC, DHB and GD were used as matrices.

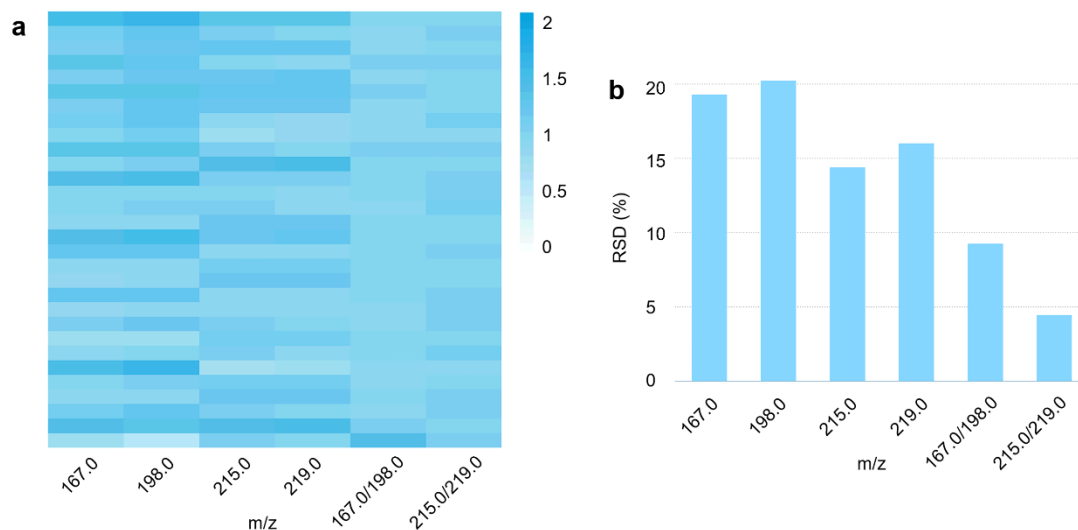

**Fig. S3** The relatively quantitative ability of internal standard. **a** Repeatability heatmap of uric acid, 3-chloro-L-phenylalanine, glucose and D-glucose-1,2-<sup>13</sup>C<sub>2</sub> signal intensities. **b** The relative standard deviation (RSD) of signal intensities. m/z 167.0: [M-H]<sup>-</sup> of uric acid, m/z 198.0: [M-H]<sup>-</sup> of 3-chloro-L-phenylalanine, m/z 215.0: [glucose+<sup>35</sup>Cl]<sup>-</sup>, m/z 219.0: [D-glucose-1,2-<sup>13</sup>C<sub>2</sub>+<sup>37</sup>Cl]<sup>-</sup>. This experiment was repeated 30 times.

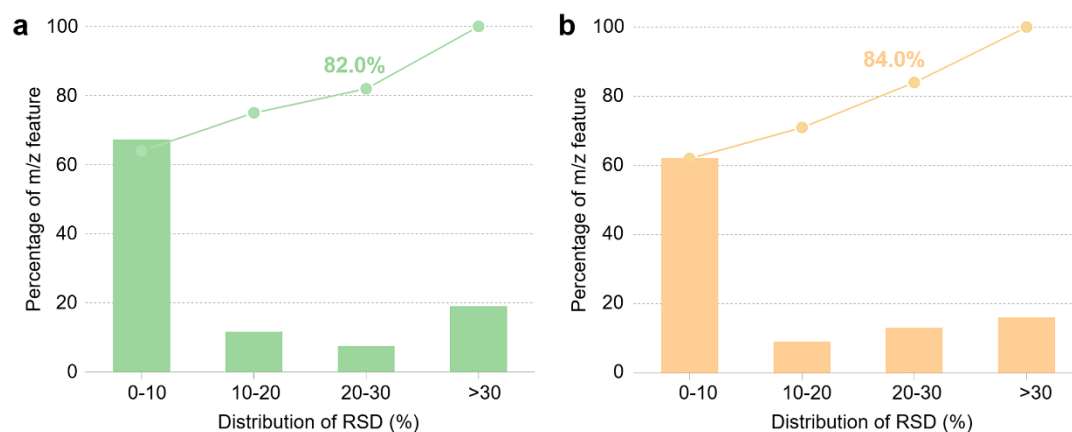

**Fig. S4** RSD distributions of m/z features in urine (a) and serum (b) samples.

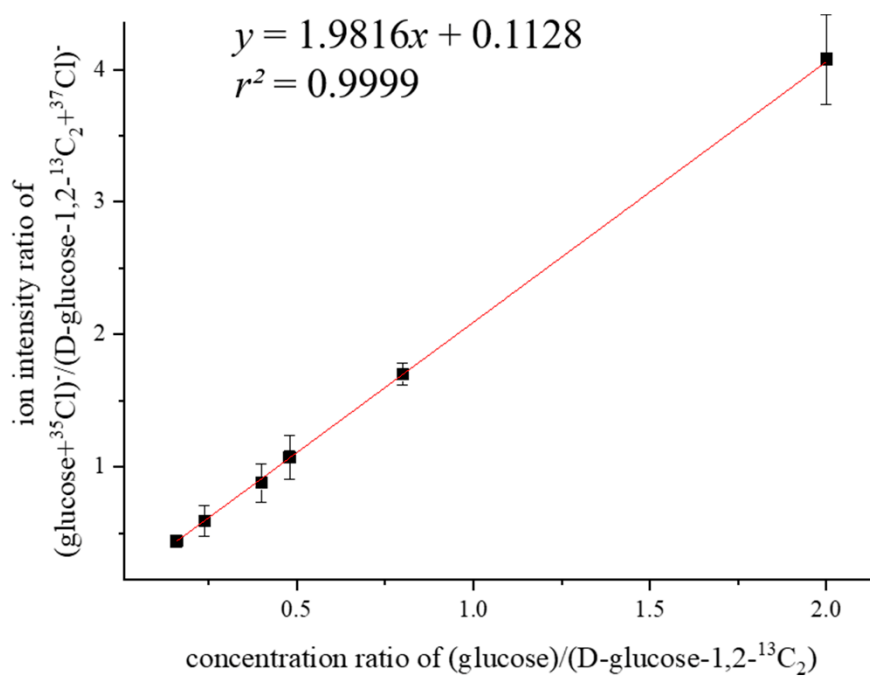

**Fig. S5** Quantitative curve of glucose using D-glucose-1,2-<sup>13</sup>C<sub>2</sub> as internal standard.



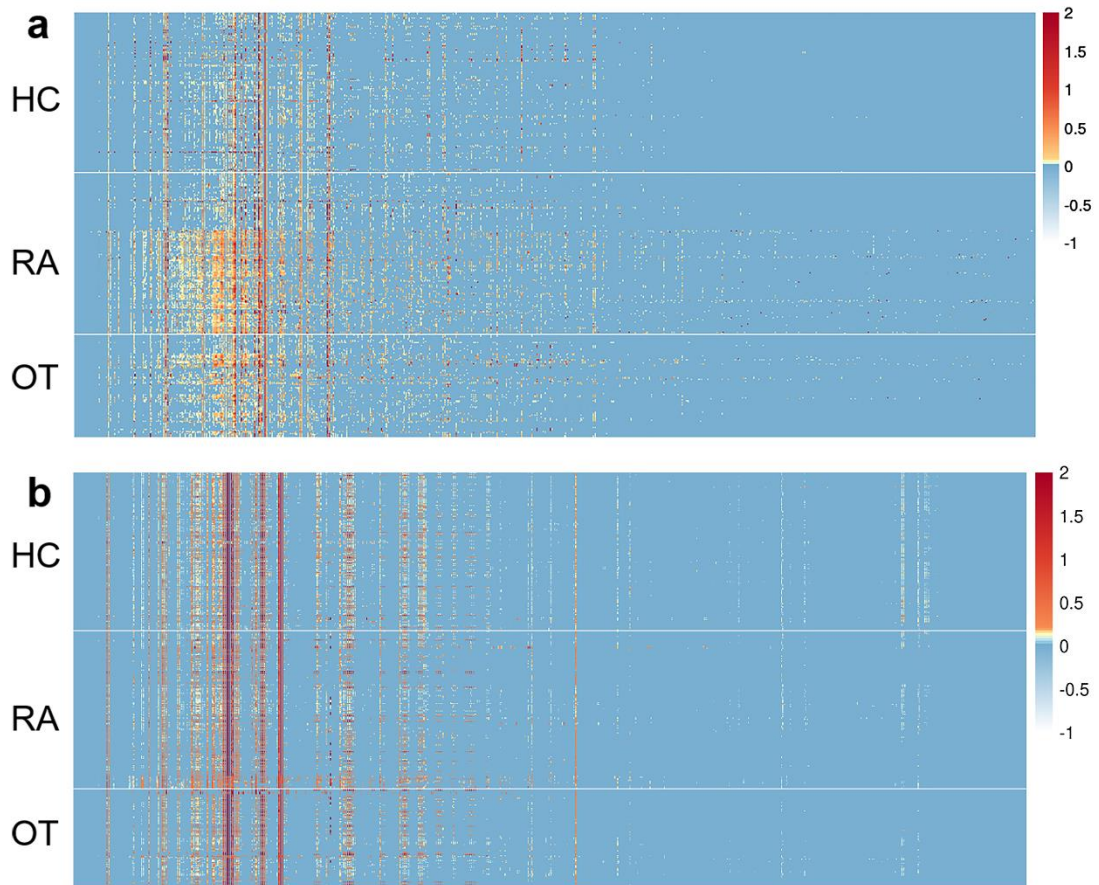

**Fig. S6** Heatmaps of 489 spectra. **a** 551 m/z features for urine samples. **b** 441 m/z features for serum samples. HC (healthy controls), RA (rheumatoid arthritis), OT (other autoimmune diseases).

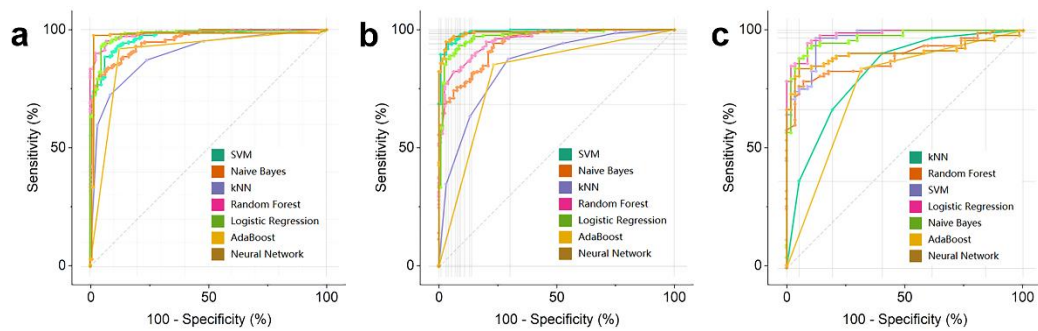

**Fig. S7** ROC curves for discrimination of autoimmune diseases (ADs) from healthy controls (HC). **a** ROC curves for training cohort with urine samples. **b** ROC curves for training cohort with serum samples. **c** ROC curves for testing cohort with serum samples.

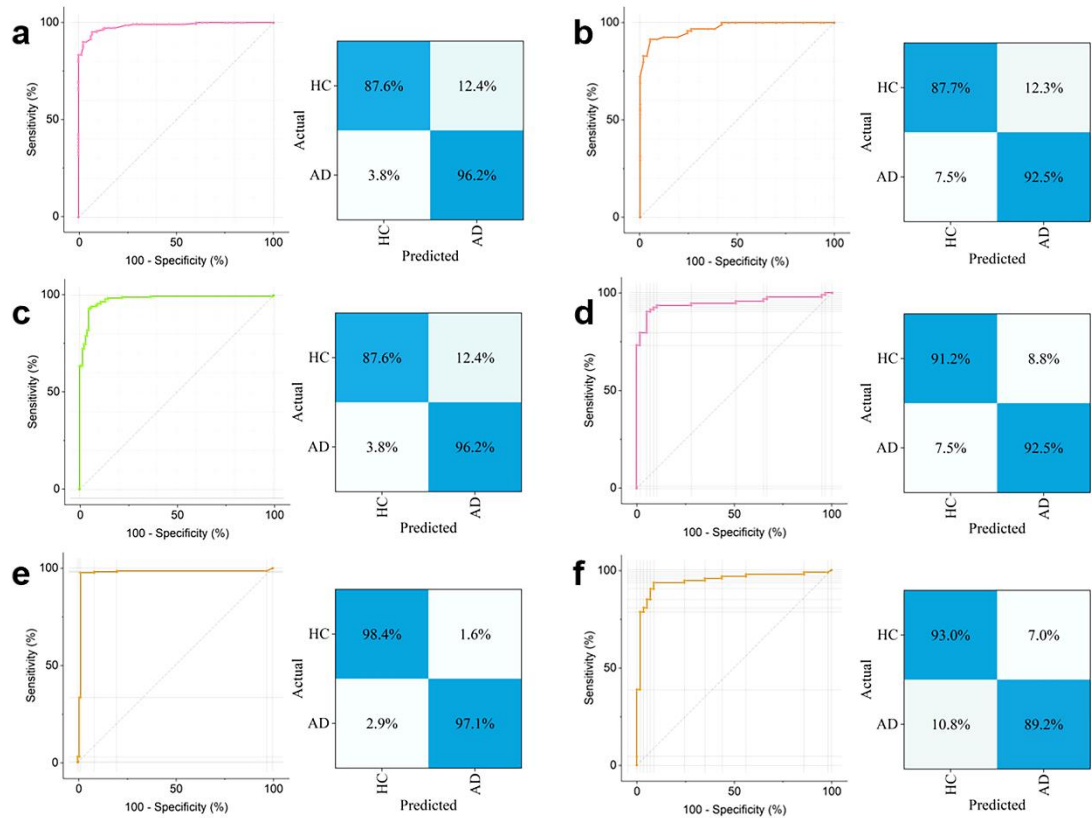

**Fig. S8** ROC curve and confusion matrix for the discrimination of autoimmune diseases (ADs) from healthy controls (HC) with urine samples. **a** Random forest (RF) for training cohort. **b** RF for testing cohort. **c** Logistic regression (LR) for training cohort. **d** LR for testing cohort. **e** Neural network (NN) for training cohort. **f** NN for testing cohort.

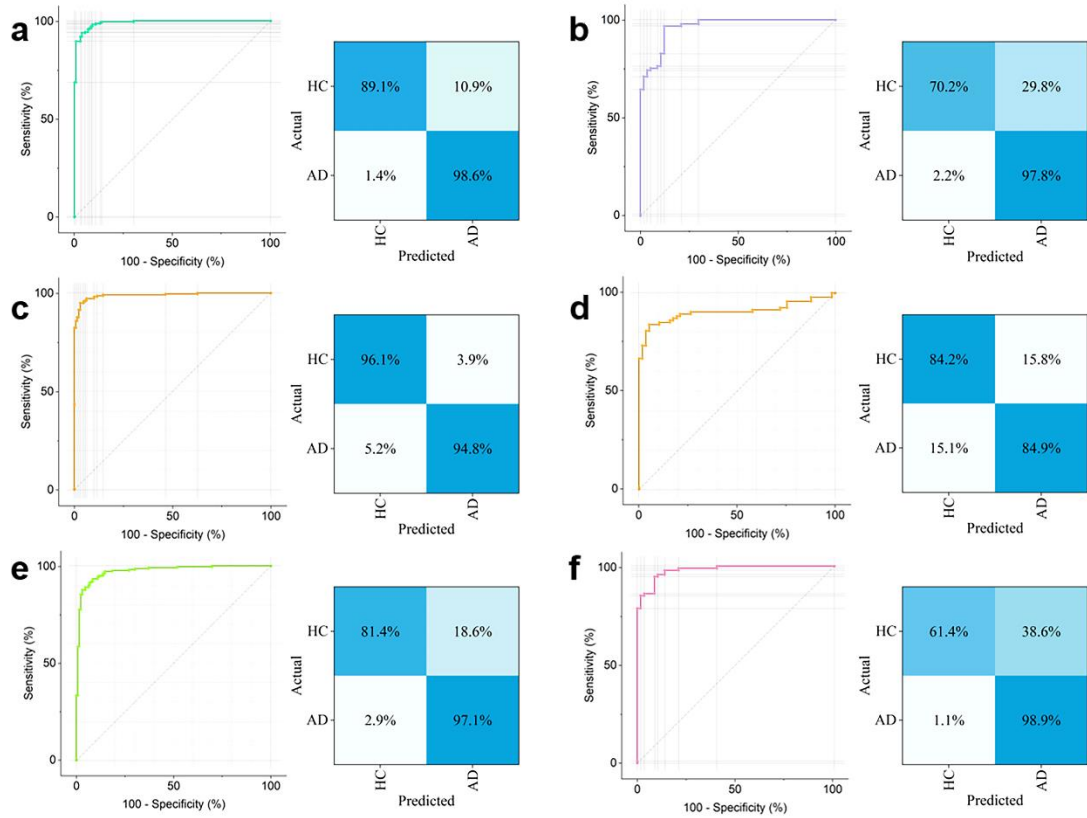

**Fig. S9** ROC curve and confusion matrix for the discrimination of autoimmune diseases (ADs) from healthy controls (HC) with serum samples. **a** Support vector machine (SVM) for training cohort. **b** SVM for testing cohort. **c** Neural network (NN) for training cohort. **d** NN for testing cohort. **e** Logistic regression (LR) for training cohort. **f** LR for testing cohort.

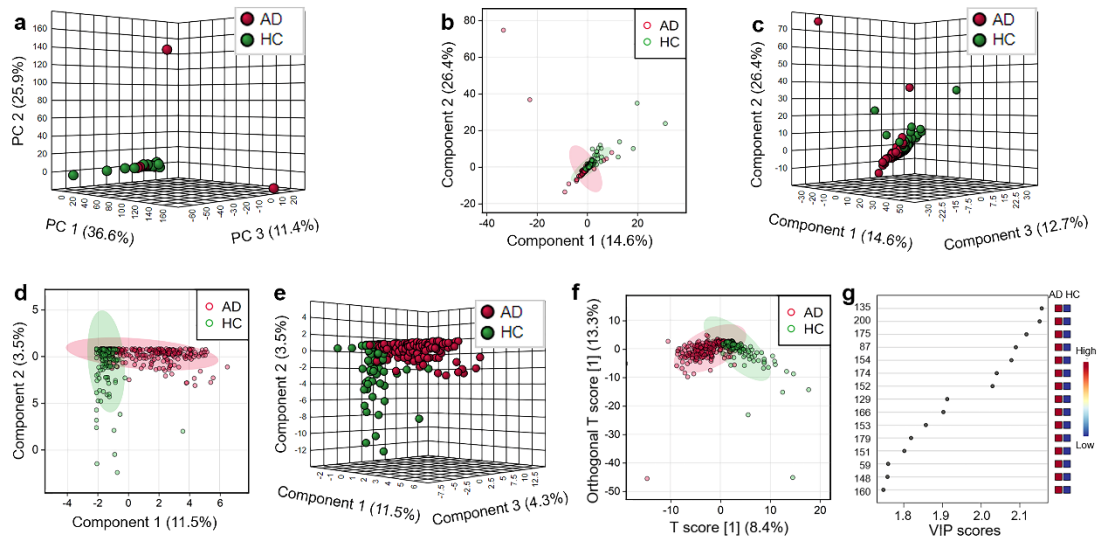

**Fig. S10** Classification results of autoimmune diseases (ADs) versus healthy controls (HC) with urine samples. **a** 3D score plot of principal component analysis (PCA). **b** 2D score plot of partial least squares discriminant analysis (PLS-DA). **c** 3D score plot of PLS-DA. **d** 2D score plot of sparse partial least squares discriminant analysis (sPLS-DA). **e** 3D score plot of sPLS-DA. **f** Score plot of orthogonal partial least squares discriminant analysis (OPLS-DA). **g** Score plot of variable importance in the projection (VIP).

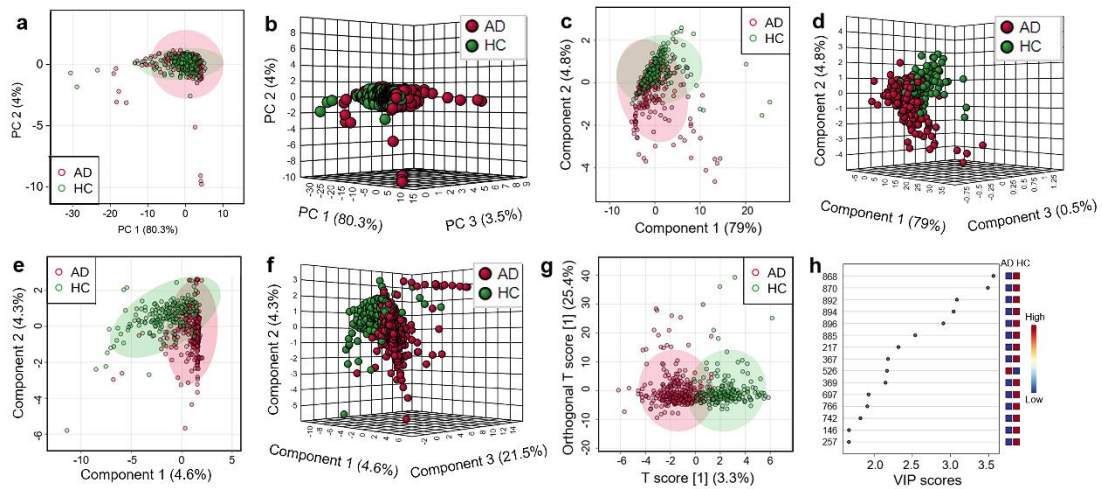

**Fig. S11** Classification results of autoimmune diseases (ADs) versus healthy controls (HC) with serum samples. **a** 2D score plot of principal component analysis (PCA). **b** 3D score plot of PCA. **c** 2D score plot of partial least squares discriminant analysis (PLS-DA). **d** 3D score plot of PLS-DA. **e** 2D score plot of sparse partial least squares discriminant analysis (sPLS-DA). **f** 3D score plot of sPLS-DA. **g** Score plot of orthogonal partial least squares discriminant analysis (OPLS-DA). **h** Score plot of variable importance in the projection (VIP).

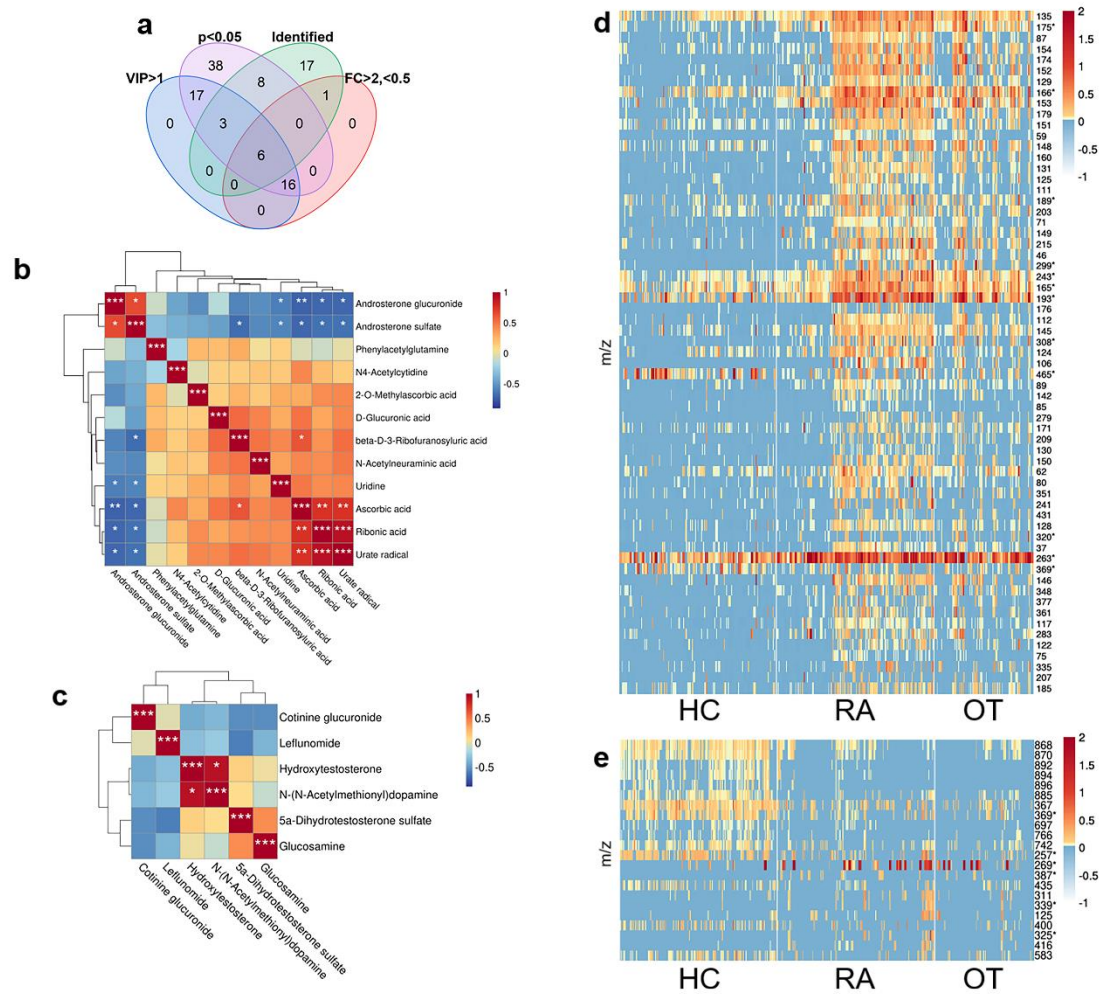

**Fig. S12** Metabolic features in autoimmune diseases versus healthy controls (ADs vs HC). a Venn diagram of metabolomic features in serum samples. 22 key features were selected with  $p < 0.05$ , VIP > 1, fold change (FC) > 2 or < 0.5, and 6 of them were identified. b Pearson correlation heatmap of 12 differential metabolites in urine samples, c 6 differential metabolites in serum samples. Red indicated positive correlation, while blue indicated negative correlation. \*: <0.05, \*\*: <0.01, \*\*\*: <0.001. d Heatmap of the key features in urine samples, e in serum samples, \* represented identified metabolites, each cell reported a relative intensity value with corresponding color, HC (healthy controls), RA (rheumatoid arthritis), OT (other autoimmune diseases).

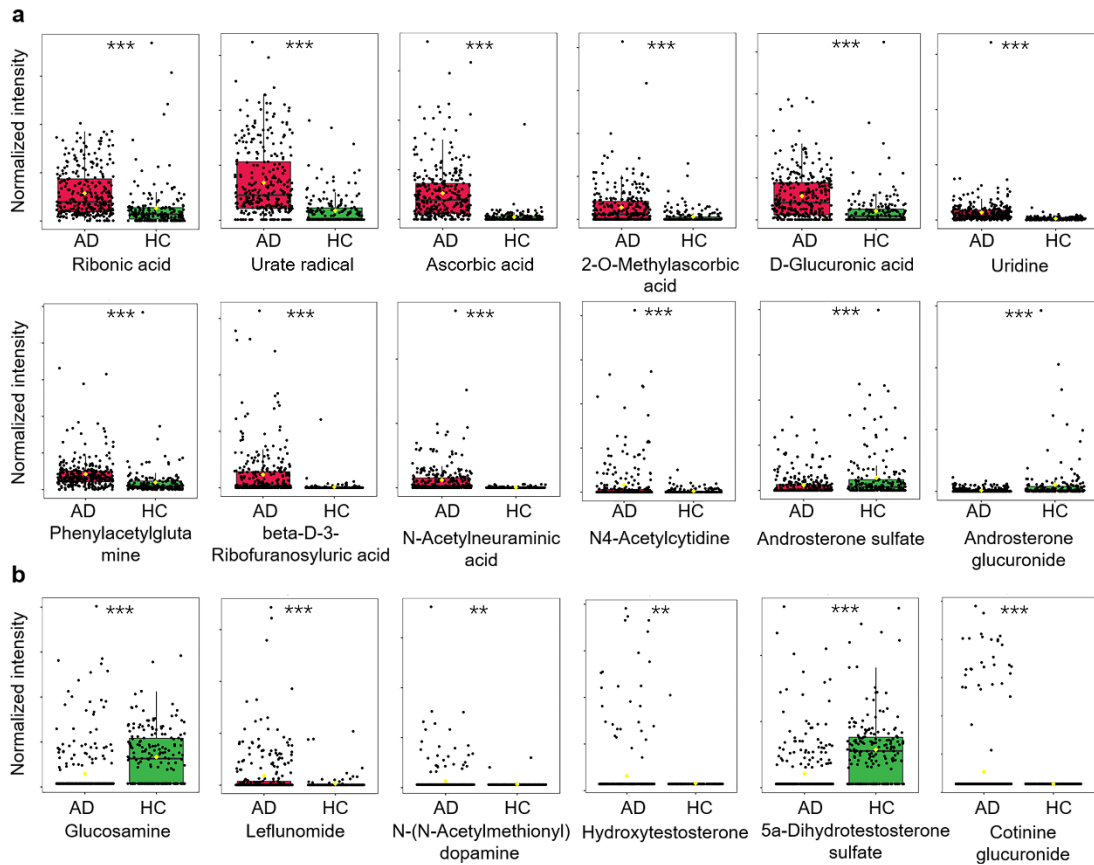

**Fig. S13** Boxplots of differential metabolites between autoimmune diseases and healthy controls (ADs vs HC). a 12 differential metabolites in urine samples, b 6 differential metabolites in serum samples. (The black dots represent the concentrations of the selected feature from all samples. The notch indicates the 95% confidence interval around the median of each group, defined as  $\pm 1.58 \cdot \text{IQR} / \sqrt{n}$ . The notch can be used to evaluate differences between groups; if the notches do not overlap, the medians are likely different. Meanwhile, the mean concentration of each group is indicated with a yellow diamond. The FDR corrected p-value was obtained from the two-tail t-test of each metabolite between ADs and HC, and the significance of comparisons was set at \* $p < 0.05$ , \*\* $p < 0.01$ , and \*\*\* $p < 0.001$ .)

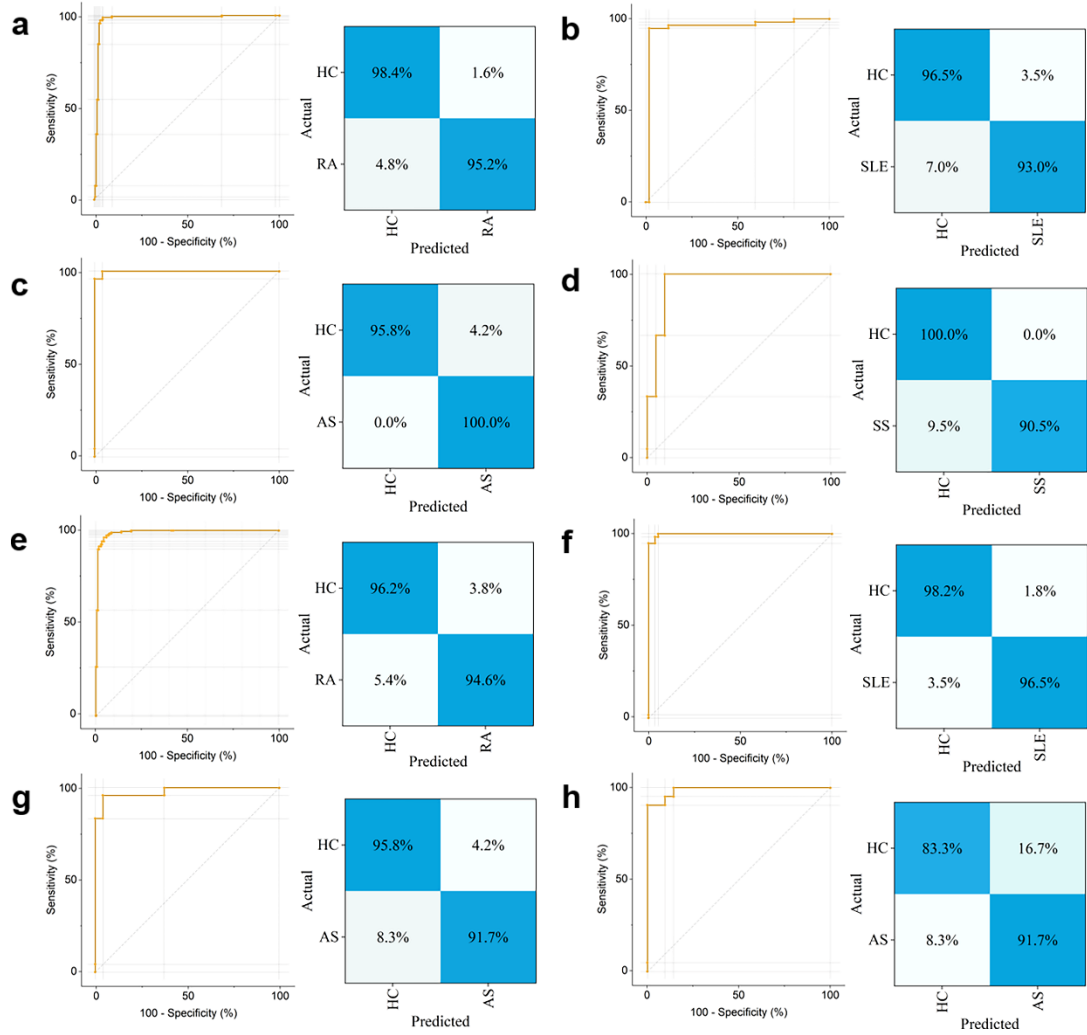

**Fig. S14** ROC curve and confusion matrix for individual autoimmune diseases (ADs) versus healthy controls (HC) obtained by neural network (NN). **a** Rheumatoid arthritis (RA) vs HC, **b** systemic lupus erythematosus (SLE) vs HC, **c** ankylosing spondylitis (AS) vs HC, **d** sicca syndrome (SS) vs HC with urine samples. **e** RA vs HC, **f** SLE vs HC, **g** AS vs HC, **h** SS vs HC with serum samples.

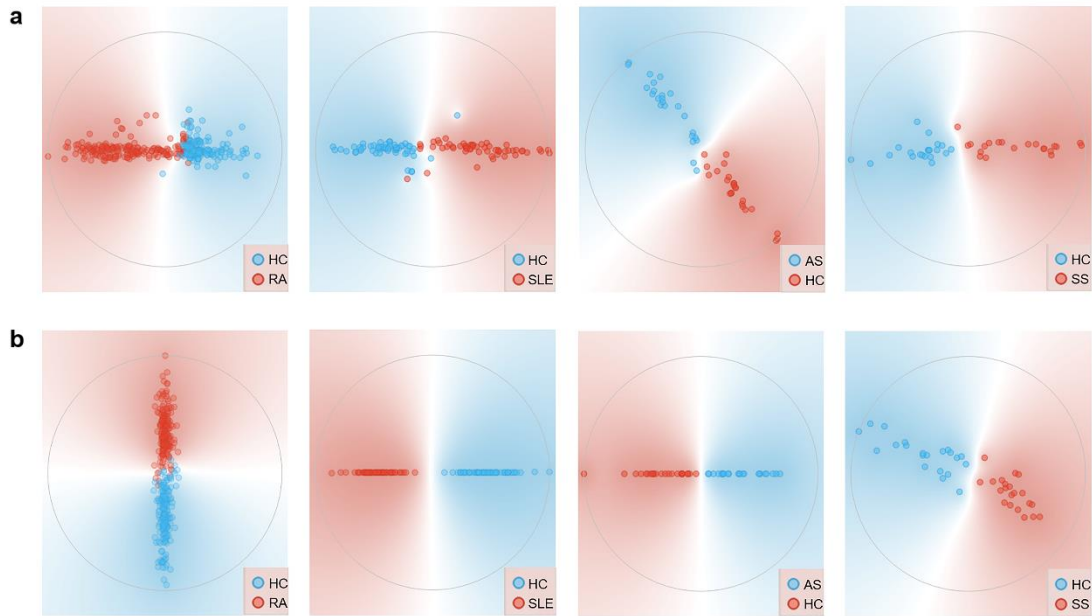

**Fig. S15** Classification diagrams obtained from FreeViz of individual autoimmune diseases (ADs) versus healthy controls (HC). **a** Rheumatoid arthritis (RA) vs HC, systemic lupus erythematosus (SLE) vs HC, ankylosing spondylitis (AS) vs HC and sicca syndrome (SS) vs HC in urine samples. **b** RA vs HC, SLE vs HC, AS vs HC and SS vs HC in serum samples.

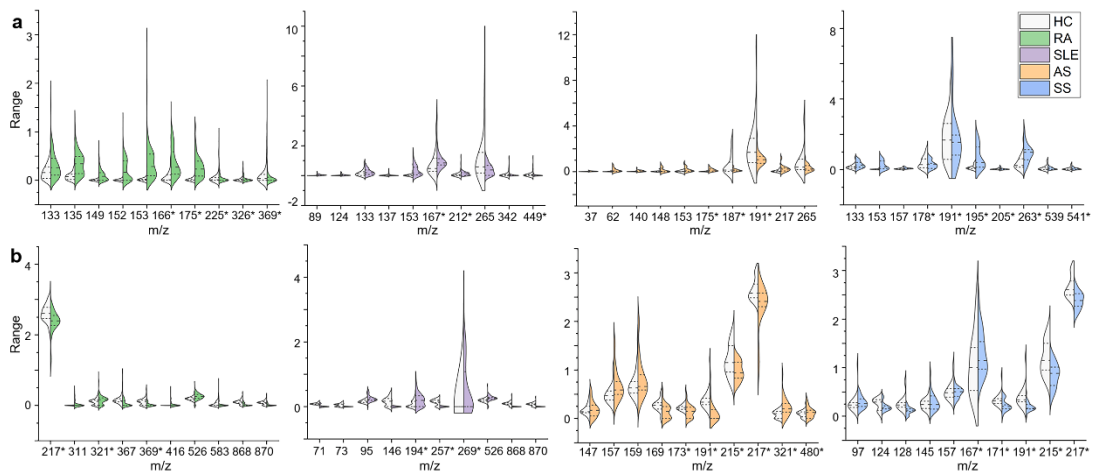

**Fig. S16** Discriminating features of each autoimmune diseases (ADs) type versus healthy controls (HC). Violin plots of top 10 m/z discriminating features intensity distributions of each ADs type vs HC (The middle dash lines indicated median value of the intensities of each corresponding m/z while the upper and lower dotted lines indicated intensity values of first quartile and third quartile. Gray represented HC while the colored represented ADs). **a** Rheumatoid arthritis (RA) vs HC, systemic lupus erythematosus (SLE) vs HC, ankylosing spondylitis (AS) vs HC and sicca syndrome (SS) vs HC in urine samples, **b** RA vs HC, SLE vs HC, AS vs HC and SS vs HC in serum samples, \* represented identified metabolites.



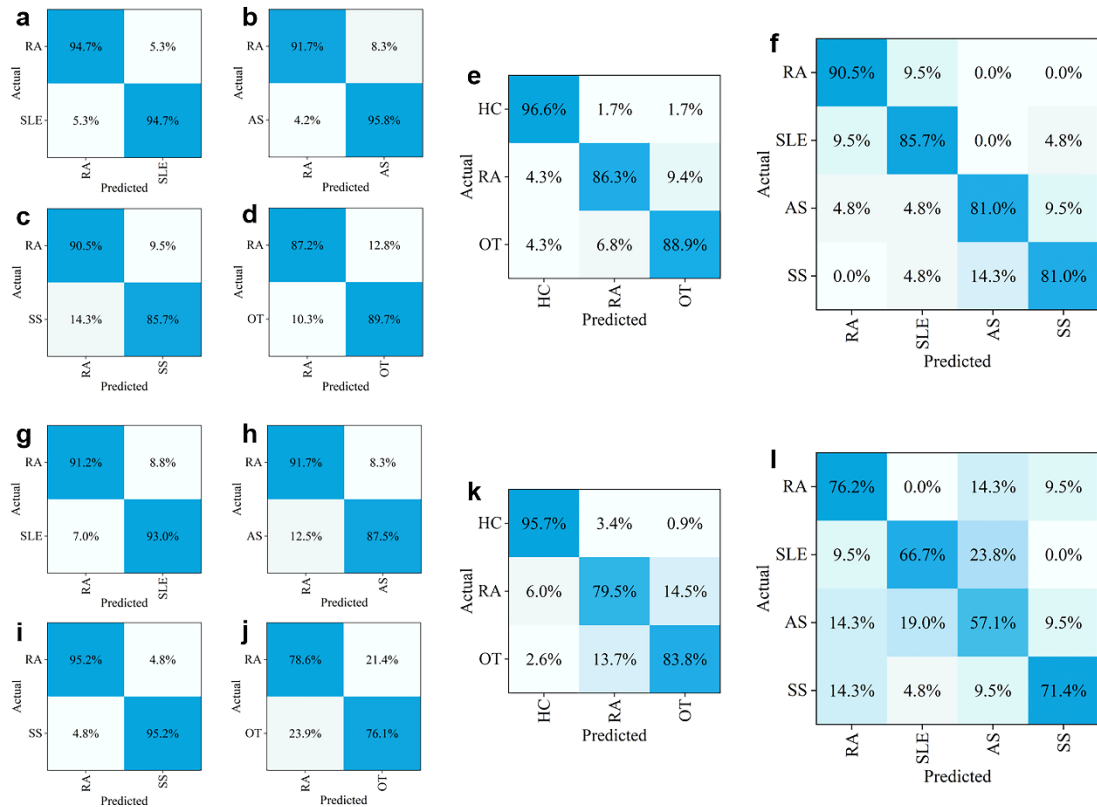

**Fig. S17** Confusion matrix for different classification models. **a** Systemic lupus erythematosus (SLE) vs rheumatoid arthritis (RA), **b** ankylosing spondylitis (AS) vs RA, **c** sicca syndrome (SS) vs RA, **d** other autoimmune diseases (OT) vs RA, **e** OT vs RA vs healthy controls (HC), **f** SS vs AS vs SLE vs RA in urine samples. **g** SLE vs RA, **h** AS vs RA, **i** SS vs RA, **j** OT vs RA, **k** OT vs RA vs HC, **l** SS vs AS vs SLE vs RA in serum samples.

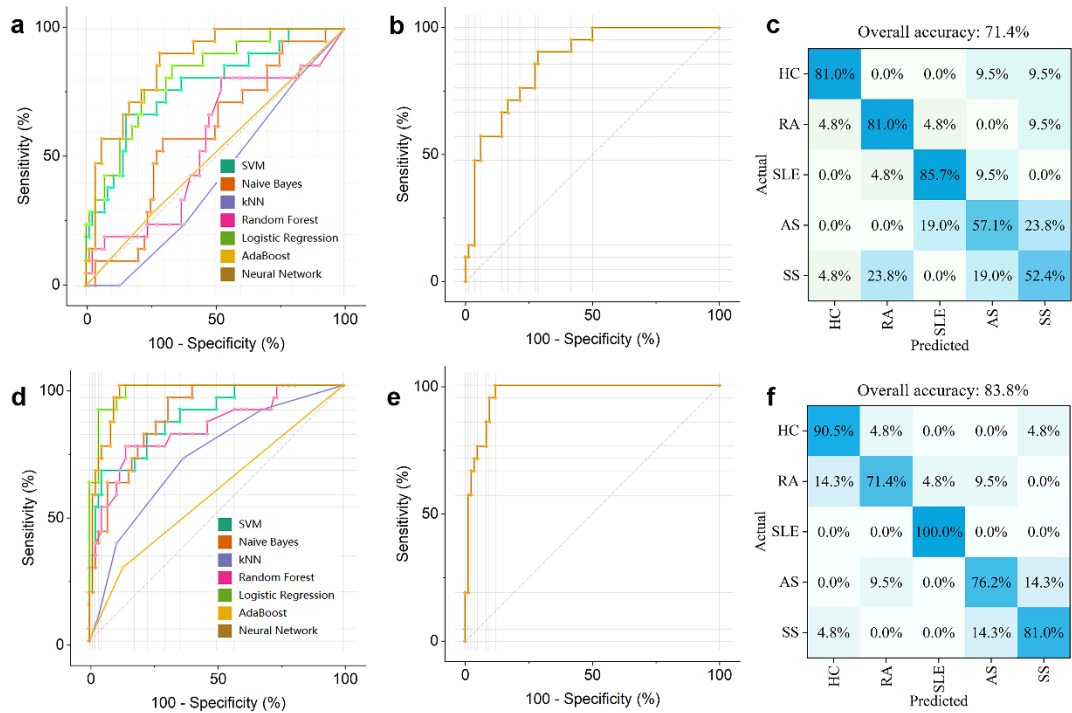

**Fig. S18** Classification results of four autoimmune diseases (ADs) and healthy controls (HC). SS vs AS vs SLE vs RA vs HC, SS (sicca syndrome), AS (ankylosing spondylitis), SLE (systemic lupus erythematosus), RA (rheumatoid arthritis). a ROC curves of different classifiers in serum samples. b ROC curve of Neural Network in serum samples. c Confusion matrix of Neural Network in serum samples. d ROC curves of different classifiers in fusion model. e ROC curve of Neural Network in fusion model. f Confusion matrix of Neural Network in fusion model.

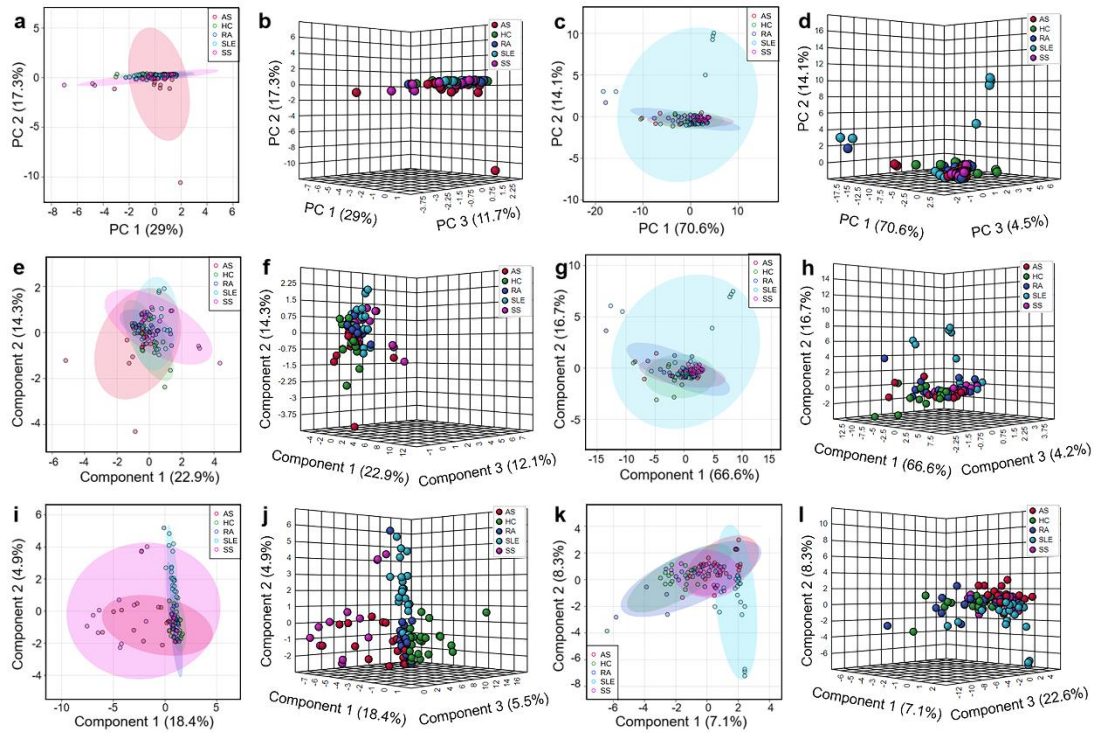

**Fig. S19** Classification results of four autoimmune diseases (ADs) and healthy controls (HC). SS vs AS vs SLE vs RA vs HC, SS (sicca syndrome), AS (ankylosing spondylitis), SLE (systemic lupus erythematosus), RA (rheumatoid arthritis). **a** 2D score plot of principal component analysis (PCA) in urine samples. **b** 3D score plot of PCA in urine samples. **c** 2D score plot of PCA in serum samples. **d** 3D score plot of PCA in serum samples. **e** 2D score plot of partial least squares discriminant analysis (PLS-DA) in urine samples. **f** 3D score plot of PLS-DA in urine samples. **g** 2D score plot of PLS-DA in serum samples. **h** 3D score plot of PLS-DA in serum samples. **i** 2D score plot of sparse partial least squares discriminant analysis (sPLS-DA) in urine samples. **j** 3D score plot of sPLS-DA in urine samples. **k** 2D score plot of sPLS-DA in serum samples. **l** 3D score plot of sPLS-DA in serum samples.

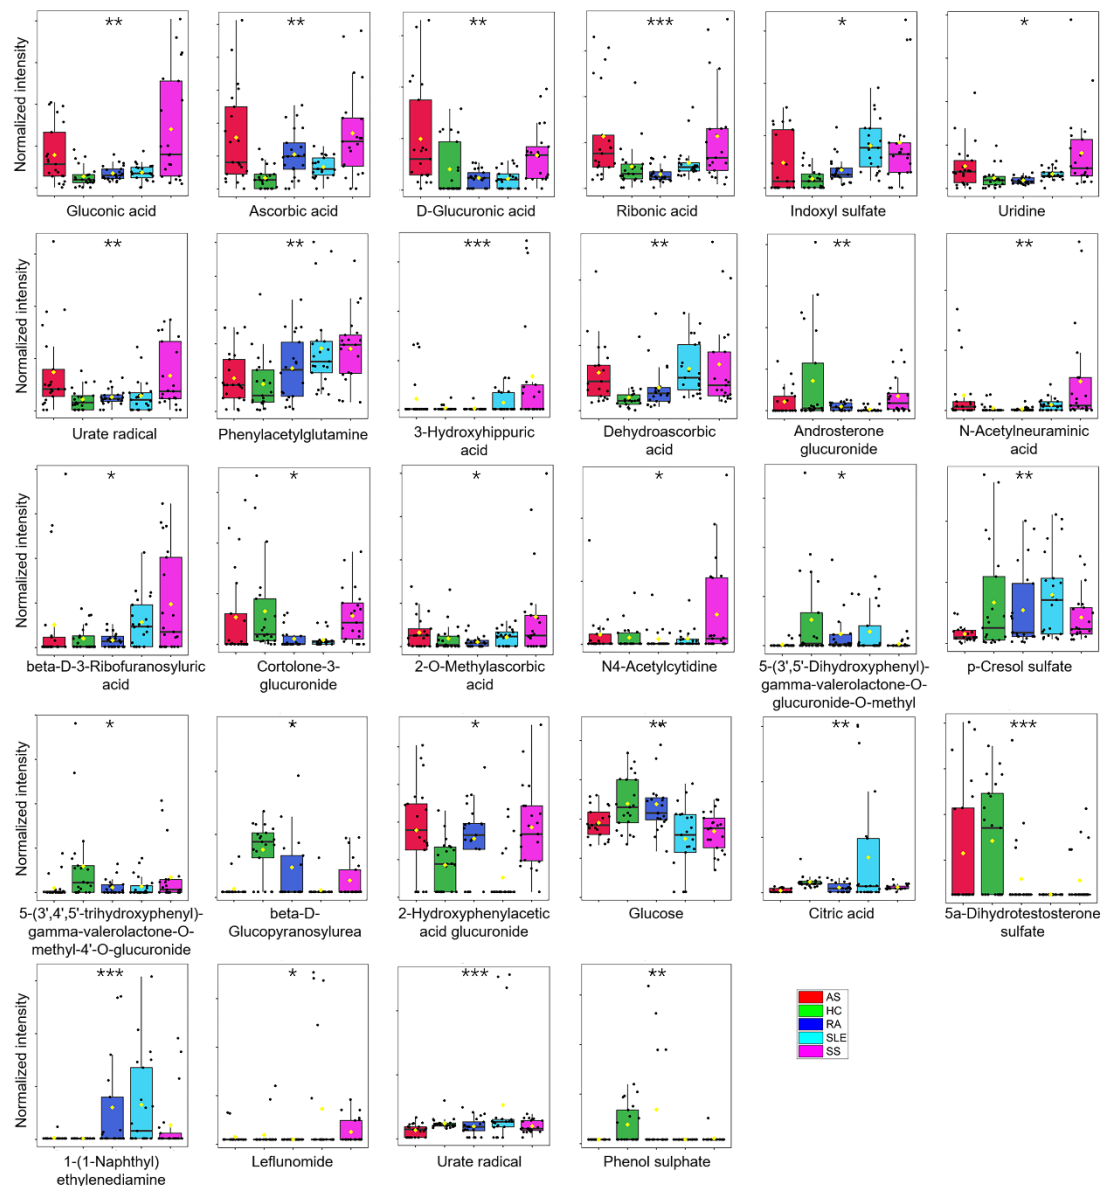

**Fig. S20** Boxplots of characteristic metabolites in the distinction of four autoimmune diseases (ADs) and healthy controls (HC). SS vs AS vs SLE vs RA vs HC, SS (sicca syndrome), AS (ankylosing spondylitis), SLE (systemic lupus erythematosus), RA (rheumatoid arthritis). 19 characteristic metabolites in urine samples and 9 characteristic metabolites in serum samples. (The black dots represent the concentrations of the selected feature from all samples. The notch indicates the 95% confidence interval around the median of each group, defined as  $\pm 1.58 \cdot \text{IQR} / \sqrt{n}$ . The notch can be used to evaluate differences between groups; if the notches do not overlap, the medians are likely different. Meanwhile, the mean concentration of each group is indicated with a yellow diamond. The FDR corrected p-value was obtained from the one-way analysis of variance (ANOVA) of each metabolite between four ADs and HC, and the significance of comparisons was set at  $*p < 0.05$ ,  $**p < 0.01$ , and  $***p < 0.001$ .)

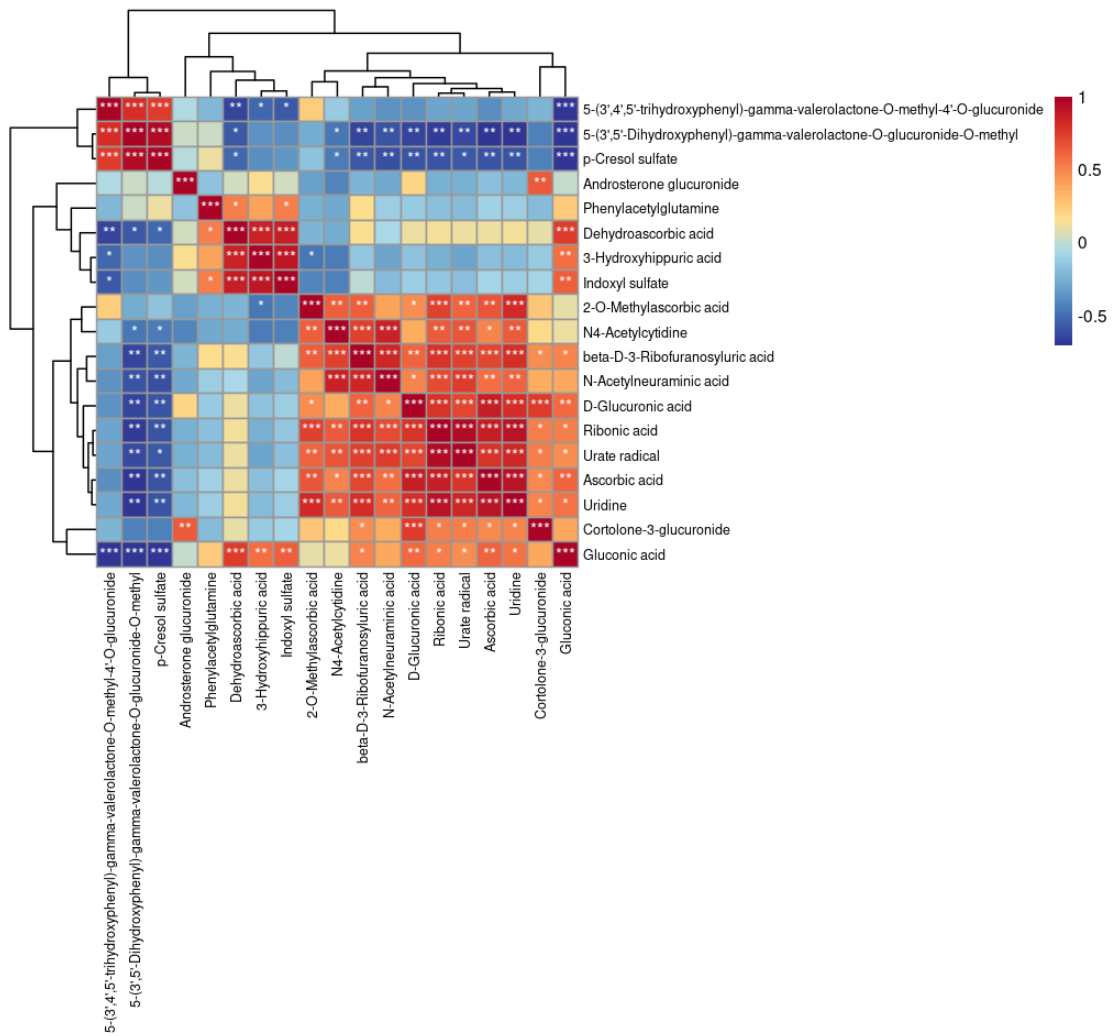

**Fig. S21** Pearson correlation heatmap of 19 characteristic metabolites in the distinction of four autoimmune diseases (ADs) and healthy controls (HC) in urine samples. Red indicated positive correlation, while blue indicated negative correlation. \*: <0.05, \*\*: <0.01, \*\*\*: <0.001.

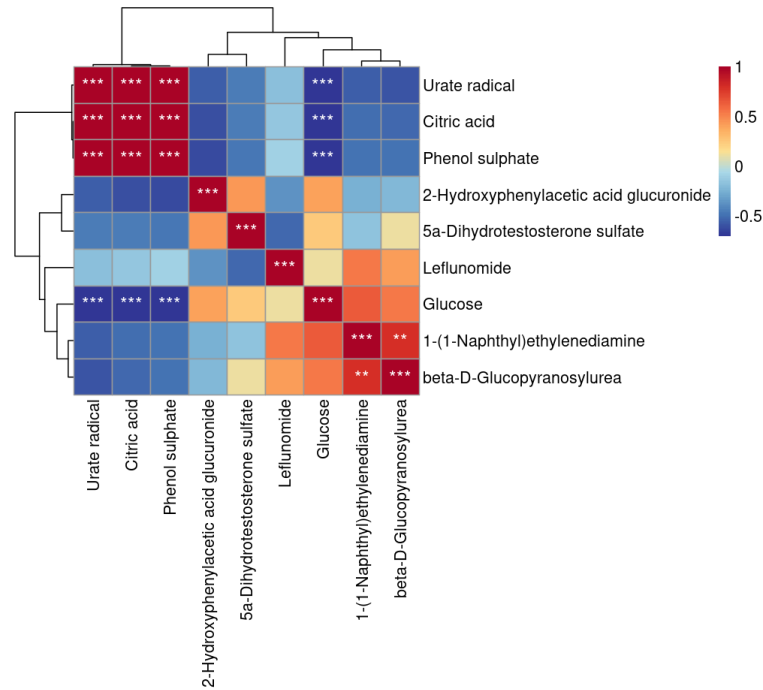

**Fig. S22** Pearson correlation heatmap of 9 characteristic metabolites in the distinction of four autoimmune diseases (ADs) and healthy controls (HC) in serum samples. Red indicated positive correlation, while blue indicated negative correlation. \*: <0.05, \*\*: <0.01, \*\*\*: <0.001.

**Table S1** Age and gender distribution of study participants.

| Groups              | Number | Age  |       |       |       |       |     | Gender |        |
|---------------------|--------|------|-------|-------|-------|-------|-----|--------|--------|
|                     |        | < 30 | 30-39 | 40-49 | 50-59 | 60-69 | ≥70 | Male   | Female |
| Healthy controls    | 62     | 8    | 5     | 14    | 19    | 8     | 8   | 28     | 34     |
| Autoimmune diseases | 101    | 10   | 9     | 17    | 36    | 15    | 14  | 32     | 69     |

**Table S2** Metrics of classifiers for autoimmune diseases versus healthy controls (ADs vs HC) with urine samples (training cohort).

| Model                  | AUC   | Accuracy | F1    | Precision | Recall |
|------------------------|-------|----------|-------|-----------|--------|
| Random Forest          | 0.983 | 0.929    | 0.929 | 0.929     | 0.929  |
| Logistic Regression    | 0.977 | 0.935    | 0.935 | 0.935     | 0.935  |
| Neural Network         | 0.972 | 0.976    | 0.976 | 0.977     | 0.976  |
| Support Vector Machine | 0.966 | 0.900    | 0.901 | 0.907     | 0.900  |
| Naive Bayes            | 0.955 | 0.820    | 0.822 | 0.871     | 0.820  |
| AdaBoost               | 0.898 | 0.903    | 0.903 | 0.903     | 0.903  |
| k-Nearest Neighbor     | 0.896 | 0.829    | 0.828 | 0.828     | 0.829  |

**Table S3** Metrics of classifiers for autoimmune diseases versus healthy controls (ADs vs HC) with urine samples (testing cohort).

| Model                  | AUC   | Accuracy | F1    | Precision | Recall |
|------------------------|-------|----------|-------|-----------|--------|
| Random Forest          | 0.970 | 0.907    | 0.907 | 0.907     | 0.907  |
| Support Vector Machine | 0.960 | 0.873    | 0.875 | 0.882     | 0.873  |
| Logistic Regression    | 0.947 | 0.920    | 0.920 | 0.921     | 0.920  |
| Neural Network         | 0.946 | 0.907    | 0.907 | 0.911     | 0.907  |
| Naive Bayes            | 0.942 | 0.873    | 0.875 | 0.882     | 0.873  |
| k-Nearest Neighbor     | 0.887 | 0.787    | 0.783 | 0.784     | 0.787  |
| AdaBoost               | 0.834 | 0.840    | 0.841 | 0.841     | 0.840  |

**Table S4** Metrics of classifiers for autoimmune diseases versus healthy controls (ADs vs HC) with serum samples (training cohort).

| Model                  | AUC   | Accuracy | F1    | Precision | Recall |
|------------------------|-------|----------|-------|-----------|--------|
| Support Vector Machine | 0.990 | 0.950    | 0.949 | 0.951     | 0.950  |
| Neural Network         | 0.989 | 0.953    | 0.953 | 0.954     | 0.953  |
| Logistic Regression    | 0.973 | 0.912    | 0.910 | 0.914     | 0.912  |
| Random Forest          | 0.956 | 0.879    | 0.878 | 0.878     | 0.879  |
| Naive Bayes            | 0.940 | 0.826    | 0.827 | 0.830     | 0.826  |
| k-Nearest Neighbor     | 0.852 | 0.811    | 0.809 | 0.809     | 0.811  |
| AdaBoost               | 0.810 | 0.820    | 0.820 | 0.820     | 0.820  |

**Table S5** Metrics of classifiers for autoimmune diseases versus healthy controls (ADs vs HC) with serum samples (testing cohort).

| Model                  | AUC   | Accuracy | F1    | Precision | Recall |
|------------------------|-------|----------|-------|-----------|--------|
| Logistic Regression    | 0.980 | 0.847    | 0.837 | 0.870     | 0.847  |
| Naive Bayes            | 0.966 | 0.907    | 0.906 | 0.907     | 0.907  |
| Support Vector Machine | 0.964 | 0.873    | 0.868 | 0.884     | 0.873  |
| Neural Network         | 0.904 | 0.847    | 0.848 | 0.851     | 0.847  |
| Random Forest          | 0.887 | 0.787    | 0.787 | 0.787     | 0.787  |
| k-Nearest Neighbor     | 0.824 | 0.787    | 0.779 | 0.787     | 0.787  |
| AdaBoost               | 0.761 | 0.780    | 0.779 | 0.778     | 0.780  |

**Table S6** Metabolites identified in urine samples in negative ion mode.

| Experimental<br>m/z | Theoretical<br>m/z | Delta<br>(ppm) | Formula                                                     | Adduct             | Compound Name              | Identification<br>Database |
|---------------------|--------------------|----------------|-------------------------------------------------------------|--------------------|----------------------------|----------------------------|
| 165.04053           | 165.04046          | 0.42414        | C <sub>5</sub> H <sub>10</sub> O <sub>6</sub>               | [M-H] <sup>-</sup> | Ribonic acid*†‡            | HMDB0000867                |
| 166.01326           | 166.01324          | 0.12047        | C <sub>5</sub> H <sub>3</sub> N <sub>4</sub> O <sub>3</sub> | [M-H] <sup>-</sup> | Urate radical*†‡           | HMDB0060260                |
| 167.02109           | 167.02106          | 0.17962        | C <sub>5</sub> H <sub>4</sub> N <sub>4</sub> O <sub>3</sub> | [M-H] <sup>-</sup> | Uric acid*                 | HMDB0000289                |
| 172.99143           | 172.99140          | 0.17342        | C <sub>6</sub> H <sub>6</sub> O <sub>4</sub> S              | [M-H] <sup>-</sup> | Phenol sulphate*           | HMDB0060015                |
| 173.00919           | 173.00916          | 0.17340        | C <sub>6</sub> H <sub>6</sub> O <sub>6</sub>                | [M-H] <sup>-</sup> | Dehydroascorbic acid*†     | HMDB0001264                |
| 173.00919           | 173.00916          | 0.17340        | C <sub>6</sub> H <sub>6</sub> O <sub>6</sub>                | [M-H] <sup>-</sup> | Aconitic acid*             | HMDB0247961                |
| 175.02481           | 175.02481          | 0.00000        | C <sub>6</sub> H <sub>8</sub> O <sub>6</sub>                | [M-H] <sup>-</sup> | Ascorbic acid*†‡           | HMDB0000044                |
| 178.05098           | 178.05097          | 0.05616        | C <sub>9</sub> H <sub>9</sub> NO <sub>3</sub>               | [M-H] <sup>-</sup> | Hippuric acid*             | HMDB0000714                |
| 187.00707           | 187.00705          | 0.10695        | C <sub>7</sub> H <sub>8</sub> O <sub>4</sub> S              | [M-H] <sup>-</sup> | p-Cresol sulfate*†‡        | HMDB0011635                |
| 189.04048           | 189.04046          | 0.10580        | C <sub>7</sub> H <sub>10</sub> O <sub>6</sub>               | [M-H] <sup>-</sup> | 2-O-Methylascorbic acid*†‡ | HMDB0240294                |
| 191.01974           | 191.01973          | 0.05235        | C <sub>6</sub> H <sub>8</sub> O <sub>7</sub>                | [M-H] <sup>-</sup> | Citric acid*               | HMDB0000094                |
| 193.03537           | 193.03538          | 0.05180        | C <sub>6</sub> H <sub>10</sub> O <sub>7</sub>               | [M-H] <sup>-</sup> | D-Glucuronic acid*†‡       | HMDB0000127                |
| 194.04588           | 194.04588          | 0.00000        | C <sub>9</sub> H <sub>9</sub> NO <sub>4</sub>               | [M-H] <sup>-</sup> | Salicyluric acid           | HMDB0000840                |
| 194.04588           | 194.04588          | 0.00000        | C <sub>9</sub> H <sub>9</sub> NO <sub>4</sub>               | [M-H] <sup>-</sup> | 3-Hydroxyhippuric acid*†‡  | HMDB0006116                |
| 194.04588           | 194.04588          | 0.00000        | C <sub>9</sub> H <sub>9</sub> NO <sub>4</sub>               | [M-H] <sup>-</sup> | 4-Hydroxyhippuric acid*    | HMDB0013678                |
| 195.05105           | 195.05103          | 0.10254        | C <sub>6</sub> H <sub>12</sub> O <sub>7</sub>               | [M-H] <sup>-</sup> | Gluconic acid*†            | HMDB0000625                |
| 195.05105           | 195.05103          | 0.10254        | C <sub>6</sub> H <sub>12</sub> O <sub>7</sub>               | [M-H] <sup>-</sup> | Galactonic acid            | HMDB0000565                |
| 195.05236           | 195.05236          | 0.00000        | C <sub>7</sub> H <sub>8</sub> N <sub>4</sub> O <sub>3</sub> | [M-H] <sup>-</sup> | 3,9-Dimethyluric acid      | HMDB0059704                |
| 195.05236           | 195.05236          | 0.00000        | C <sub>7</sub> H <sub>8</sub> N <sub>4</sub> O <sub>3</sub> | [M-H] <sup>-</sup> | 1,7-Dimethyluric acid*     | HMDB0011103                |
| 195.05236           | 195.05236          | 0.00000        | C <sub>7</sub> H <sub>8</sub> N <sub>4</sub> O <sub>3</sub> | [M-H] <sup>-</sup> | 7,9-Dimethyluric acid      | HMDB0004308                |
| 195.05236           | 195.05236          | 0.00000        | C <sub>7</sub> H <sub>8</sub> N <sub>4</sub> O <sub>3</sub> | [M-H] <sup>-</sup> | 1,9-Dimethyluric acid      | HMDB0002026                |
| 195.05236           | 195.05236          | 0.00000        | C <sub>7</sub> H <sub>8</sub> N <sub>4</sub> O <sub>3</sub> | [M-H] <sup>-</sup> | 3,7-Dimethyluric acid*     | HMDB0001982                |
| 195.05236           | 195.05236          | 0.00000        | C <sub>7</sub> H <sub>8</sub> N <sub>4</sub> O <sub>3</sub> | [M-H] <sup>-</sup> | 1,3-Dimethyluric acid      | HMDB0001857                |



|           |           |         |                                                                 |                                     |                                                                                |             |
|-----------|-----------|---------|-----------------------------------------------------------------|-------------------------------------|--------------------------------------------------------------------------------|-------------|
| 205.03538 | 205.03538 | 0.00000 | C <sub>7</sub> H <sub>10</sub> O <sub>7</sub>                   | [M-H] <sup>-</sup>                  | 2-Methylcitric acid                                                            | HMDB0000379 |
| 212.00232 | 212.00230 | 0.09434 | C <sub>8</sub> H <sub>7</sub> NO <sub>4</sub> S                 | [M-H] <sup>-</sup>                  | Indoxyl sulfate*†                                                              | HMDB0000682 |
| 212.00232 | 212.00230 | 0.09434 | C <sub>8</sub> H <sub>7</sub> NO <sub>4</sub> S                 | [M-H] <sup>-</sup>                  | 7-Hydroxyindole sulfate*                                                       | HMDB0240659 |
| 212.00232 | 212.00230 | 0.09434 | C <sub>8</sub> H <sub>7</sub> NO <sub>4</sub> S                 | [M-H] <sup>-</sup>                  | 6-Hydroxyindole sulfate                                                        | HMDB0240651 |
| 225.08808 | 225.08808 | 0.00000 | C <sub>10</sub> H <sub>14</sub> N <sub>2</sub> O <sub>4</sub>   | [M-H] <sup>-</sup>                  | Porphobilinogen*                                                               | HMDB0000245 |
| 243.06224 | 243.06226 | 0.08228 | C <sub>9</sub> H <sub>12</sub> N <sub>2</sub> O <sub>6</sub>    | [M-H] <sup>-</sup>                  | Uridine*†‡                                                                     | HMDB0000296 |
| 243.06224 | 243.06226 | 0.08228 | C <sub>9</sub> H <sub>12</sub> N <sub>2</sub> O <sub>6</sub>    | [M-H] <sup>-</sup>                  | Pseudouridine*                                                                 | HMDB0000767 |
| 263.10375 | 263.10373 | 0.07602 | C <sub>13</sub> H <sub>16</sub> N <sub>2</sub> O <sub>4</sub>   | [M-H] <sup>-</sup>                  | Phenylacetylglutamine*†‡                                                       | HMDB0006344 |
| 299.06348 | 299.06332 | 0.53500 | C <sub>10</sub> H <sub>12</sub> N <sub>4</sub> O <sub>7</sub>   | [M-H] <sup>-</sup>                  | beta-D-3-Ribofuranosyluric acid*†‡                                             | HMDB0029920 |
| 305.10310 | 305.10306 | 0.13110 | C <sub>16</sub> H <sub>18</sub> O <sub>6</sub>                  | [M-H] <sup>-</sup>                  | 6-O-Desmethyl-mycophenolic acid                                                | HMDB0060788 |
| 308.09883 | 308.09871 | 0.38949 | C <sub>11</sub> H <sub>19</sub> NO <sub>9</sub>                 | [M-H] <sup>-</sup>                  | N-Acetylneuraminic acid*†‡                                                     | HMDB0000230 |
| 320.06549 | 320.06549 | 0.00000 | C <sub>11</sub> H <sub>15</sub> N <sub>3</sub> O <sub>6</sub>   | [M+Cl] <sup>-</sup>                 | N4-Acetylcytidine*†‡                                                           | HMDB0005923 |
| 326.08814 | 326.08814 | 0.00000 | C <sub>14</sub> H <sub>17</sub> NO <sub>8</sub>                 | [M-H] <sup>-</sup>                  | Blepharin*                                                                     | HMDB0029344 |
| 326.08814 | 326.08814 | 0.00000 | C <sub>14</sub> H <sub>17</sub> NO <sub>8</sub>                 | [M-H] <sup>-</sup>                  | Acetaminophen glucuronide*                                                     | HMDB0010316 |
| 330.09175 | 330.09179 | 0.12118 | C <sub>16</sub> H <sub>17</sub> N <sub>3</sub> O <sub>3</sub> S | [M-H] <sup>-</sup>                  | (R)-2-Amino-3-benzylthio-N-(4-nitrophenyl)propionamide                         | HMDB0247352 |
| 330.09175 | 330.09179 | 0.12118 | C <sub>16</sub> H <sub>17</sub> N <sub>3</sub> O <sub>3</sub> S | [M-H] <sup>-</sup>                  | 5'-O-Desmethyl omeprazole                                                      | HMDB0014011 |
| 369.17412 | 369.17412 | 0.00000 | C <sub>19</sub> H <sub>30</sub> O <sub>5</sub> S                | [M-H] <sup>-</sup>                  | Androsterone sulfate*†                                                         | HMDB0002759 |
| 397.11428 | 397.11402 | 0.65472 | C <sub>18</sub> H <sub>22</sub> O <sub>10</sub>                 | [M-H] <sup>-</sup>                  | 5-(3',5'-Dihydroxyphenyl)-gamma-valerolactone-O-glucuronide-O-methyl*†‡        | HMDB0060030 |
| 397.11428 | 397.11402 | 0.65472 | C <sub>18</sub> H <sub>22</sub> O <sub>10</sub>                 | [M-H] <sup>-</sup>                  | 5-(3',4'-Dihydroxyphenyl)-gamma-valerolactone-4'-O-methyl-3'-O-glucuronide     | HMDB0059990 |
| 397.11428 | 397.11402 | 0.65472 | C <sub>18</sub> H <sub>22</sub> O <sub>10</sub>                 | [M-H] <sup>-</sup>                  | 5-(3',4'-Dihydroxyphenyl)-gamma-valerolactone-3'-O-methyl-4'-O-glucuronide     | HMDB0059988 |
| 397.11428 | 397.11402 | 0.65472 | C <sub>18</sub> H <sub>22</sub> O <sub>10</sub>                 | [M-H] <sup>-</sup>                  | 5-(3',4'-dihydroxyphenyl)-gamma-valerolactone-3'-O-glucuronide                 | HMDB0029190 |
| 413.10878 | 413.10894 | 0.38731 | C <sub>18</sub> H <sub>22</sub> O <sub>11</sub>                 | [M-H] <sup>-</sup>                  | 5-(3',4',5'-trihydroxyphenyl)-gamma-valerolactone-O-methyl-4'-O-glucuronide*†‡ | HMDB0060027 |
| 413.10878 | 413.10894 | 0.38731 | C <sub>18</sub> H <sub>22</sub> O <sub>11</sub>                 | [M-H] <sup>-</sup>                  | 5-(3',4',5'-trihydroxyphenyl)-gamma-valerolactone-O-methyl-5'-O-glucuronide    | HMDB0060028 |
| 433.13498 | 433.13515 | 0.39249 | C <sub>18</sub> H <sub>26</sub> O <sub>12</sub>                 | [M-H] <sup>-</sup>                  | 4-Hydroxy-5-(3',5'-dihydroxyphenyl)-valeric acid-O-methyl-O-glucuronide        | HMDB0059974 |
| 433.13498 | 433.13515 | 0.39249 | C <sub>18</sub> H <sub>26</sub> O <sub>12</sub>                 | [M-H] <sup>-</sup>                  | 4-Hydroxy-5-(3',4'-dihydroxyphenyl)-valeric acid-O-methyl-O-glucuronide        | HMDB0059972 |
| 449.25393 | 449.25448 | 1.22425 | C <sub>25</sub> H <sub>40</sub> O <sub>8</sub>                  | [M-H <sub>2</sub> O-H] <sup>-</sup> | 17-Hydroxyandrostane-3-glucuronide*                                            | HMDB0010359 |

|           |           |         |                                                                   |                                     |                                                                                                                |             |
|-----------|-----------|---------|-------------------------------------------------------------------|-------------------------------------|----------------------------------------------------------------------------------------------------------------|-------------|
| 449.25393 | 449.25448 | 1.22425 | C <sub>25</sub> H <sub>40</sub> O <sub>8</sub>                    | [M-H <sub>2</sub> O-H] <sup>-</sup> | 3- $\alpha$ -Androstenediol glucuronide*                                                                       | HMDB0010339 |
| 449.25393 | 449.25448 | 1.22425 | C <sub>25</sub> H <sub>40</sub> O <sub>8</sub>                    | [M-H <sub>2</sub> O-H] <sup>-</sup> | 3,17-Androstenediol glucuronide*                                                                               | HMDB0010321 |
| 465.24943 | 465.24939 | 0.08598 | C <sub>25</sub> H <sub>38</sub> O <sub>8</sub>                    | [M-H] <sup>-</sup>                  | Androsterone glucuronide*†‡                                                                                    | HMDB0002829 |
| 481.13512 | 481.13582 | 1.45489 | C <sub>26</sub> H <sub>29</sub> ClN <sub>2</sub> O <sub>4</sub> S | [M-H <sub>2</sub> O-H] <sup>-</sup> | (E)-N-(2-(((3-(4-Chlorophenyl)allyl)(methylamino)methyl)phenyl)-N-(2-hydroxyethyl)-4-methoxybenzenesulfonamide | HMDB0253810 |
| 495.15078 | 495.15080 | 0.04039 | C <sub>23</sub> H <sub>28</sub> O <sub>12</sub>                   | [M-H] <sup>-</sup>                  | Mycophenolic acid glucuronide                                                                                  | HMDB0060634 |
| 495.15078 | 495.15080 | 0.04039 | C <sub>23</sub> H <sub>28</sub> O <sub>12</sub>                   | [M-H] <sup>-</sup>                  | Mycophenolic acid O-acyl-glucuronide                                                                           | HMDB0060491 |
| 541.26544 | 541.26544 | 0.00000 | C <sub>27</sub> H <sub>42</sub> O <sub>11</sub>                   | [M-H] <sup>-</sup>                  | Cortolone-3-glucuronide*†                                                                                      | HMDB0010320 |

\* Metabolites validated by LC-MS/MS, † Differential metabolites in ADs vs HC, ‡ Differential metabolites in SS vs AS vs SLE vs RA vs HC.

**Table S7** Metabolites identified in serum samples in negative ion mode.

| Experimental m/z | Theoretical m/z | Delta (ppm) | Formula                                                      | Adduct              | Compound Name                                            | Identification Database |
|------------------|-----------------|-------------|--------------------------------------------------------------|---------------------|----------------------------------------------------------|-------------------------|
| 159.84517        | 159.84515       | 0.12512     | Cl <sub>2</sub> Mn                                           | [M+Cl] <sup>-</sup> | Manganese(II) chloride                                   | HMDB0303438             |
| 165.00544        | 165.00541       | 0.18181     | C <sub>5</sub> H <sub>2</sub> N <sub>4</sub> O <sub>3</sub>  | [M-H] <sup>-</sup>  | Nitroimidazo-oxazine                                     | HMDB0255651             |
| 166.01327        | 166.01324       | 0.18071     | C <sub>5</sub> H <sub>3</sub> N <sub>4</sub> O <sub>3</sub>  | [M-H] <sup>-</sup>  | Urate radical*†‡                                         | HMDB0060260             |
| 167.02109        | 167.02106       | 0.17962     | C <sub>5</sub> H <sub>4</sub> N <sub>4</sub> O <sub>3</sub>  | [M-H] <sup>-</sup>  | Uric acid*                                               | HMDB0000289             |
| 167.06150        | 167.06147       | 0.17957     | C <sub>11</sub> H <sub>8</sub> N <sub>2</sub>                | [M-H] <sup>-</sup>  | Pyrroloquinoline                                         | HMDB0257007             |
| 167.06150        | 167.06147       | 0.17957     | C <sub>11</sub> H <sub>8</sub> N <sub>2</sub>                | [M-H] <sup>-</sup>  | 5H-Pyrido[4,3-b]indole                                   | HMDB0247024             |
| 167.06150        | 167.06147       | 0.17957     | C <sub>11</sub> H <sub>8</sub> N <sub>2</sub>                | [M-H] <sup>-</sup>  | 1H-Pyrrolo[2,3-f]quinoline                               | HMDB0244904             |
| 167.06150        | 167.06147       | 0.17957     | C <sub>11</sub> H <sub>8</sub> N <sub>2</sub>                | [M-H] <sup>-</sup>  | beta-Carboline                                           | HMDB0012897             |
| 170.88371        | 170.88372       | 0.05852     | CaO <sub>4</sub> S                                           | [M+Cl] <sup>-</sup> | Calcium sulfate                                          | HMDB0303525             |
| 172.99143        | 172.99140       | 0.17342     | C <sub>6</sub> H <sub>6</sub> O <sub>4</sub> S               | [M-H] <sup>-</sup>  | O-Phenolsulfonic acid                                    | HMDB0304953             |
| 172.99143        | 172.99140       | 0.17342     | C <sub>6</sub> H <sub>6</sub> O <sub>4</sub> S               | [M-H] <sup>-</sup>  | Phenol sulphate*†‡                                       | HMDB0060015             |
| 179.05613        | 179.05611       | 0.11170     | C <sub>6</sub> H <sub>12</sub> O <sub>6</sub>                | [M-H] <sup>-</sup>  | Glucose*†‡                                               | HMDB0304632             |
| 185.05681        | 185.05678       | 0.16211     | C <sub>7</sub> H <sub>10</sub> N <sub>2</sub> O <sub>4</sub> | [M-H] <sup>-</sup>  | 2-Amino-2-(5-methyl-3-oxo-1,2-oxazol-4-yl)propanoic Acid | HMDB0257684             |

|           |           |         |                                                              |                     |                                                          |             |
|-----------|-----------|---------|--------------------------------------------------------------|---------------------|----------------------------------------------------------|-------------|
| 185.05681 | 185.05678 | 0.16211 | C <sub>7</sub> H <sub>10</sub> N <sub>2</sub> O <sub>4</sub> | [M-H] <sup>-</sup>  | alpha-amino-3-hydroxy-5-methyl-4-isoxazolepropionic acid | HMDB0248356 |
| 185.05681 | 185.05678 | 0.16211 | C <sub>7</sub> H <sub>10</sub> N <sub>2</sub> O <sub>4</sub> | [M-H] <sup>-</sup>  | Pyroglutamylglycine                                      | HMDB0061890 |
| 185.10845 | 185.10842 | 0.16207 | C <sub>12</sub> H <sub>14</sub> N <sub>2</sub>               | [M-H] <sup>-</sup>  | 1-(1-Naphthyl)ethylenediamine*‡                          | HMDB0255454 |
| 185.10845 | 185.10842 | 0.16207 | C <sub>12</sub> H <sub>14</sub> N <sub>2</sub>               | [M-H] <sup>-</sup>  | N-(1-Naphthyl)ethylenediamine                            | HMDB0254982 |
| 186.85610 | 186.85607 | 0.16055 | FeO <sub>4</sub> S                                           | [M+Cl] <sup>-</sup> | Iron(II) sulfate                                         | HMDB0303497 |
| 187.00708 | 187.00705 | 0.16042 | C <sub>7</sub> H <sub>8</sub> O <sub>4</sub> S               | [M-H] <sup>-</sup>  | p-Cresol sulfate*                                        | HMDB0011635 |
| 191.01975 | 191.01973 | 0.10470 | C <sub>6</sub> H <sub>8</sub> O <sub>7</sub>                 | [M-H] <sup>-</sup>  | Citric acid*‡                                            | HMDB0000094 |
| 194.04588 | 194.04588 | 0.00000 | C <sub>9</sub> H <sub>9</sub> NO <sub>4</sub>                | [M-H] <sup>-</sup>  | Salicyluric acid                                         | HMDB0000840 |
| 194.04588 | 194.04588 | 0.00000 | C <sub>9</sub> H <sub>9</sub> NO <sub>4</sub>                | [M-H] <sup>-</sup>  | 3-Hydroxyhippuric acid*                                  | HMDB0006116 |
| 195.05105 | 195.05103 | 0.10254 | C <sub>6</sub> H <sub>12</sub> O <sub>7</sub>                | [M-H] <sup>-</sup>  | Gluconic acid*                                           | HMDB0000625 |
| 195.05105 | 195.05103 | 0.10254 | C <sub>6</sub> H <sub>12</sub> O <sub>7</sub>                | [M-H] <sup>-</sup>  | Galactonic acid                                          | HMDB0000565 |
| 195.81092 | 195.81103 | 0.56177 | Cl <sub>3</sub> Fe                                           | [M+Cl] <sup>-</sup> | Iron(III) chloride                                       | HMDB0303404 |
| 198.03275 | 198.03273 | 0.10099 | C <sub>9</sub> H <sub>10</sub> ClNO <sub>2</sub>             | [M-H] <sup>-</sup>  | N-Chlorophenylalanine*                                   | HMDB0255100 |
| 198.03275 | 198.03273 | 0.10099 | C <sub>9</sub> H <sub>9</sub> NO <sub>2</sub>                | [M+Cl] <sup>-</sup> | 2-Methyl-2H-1,3-benzoxazin-4(3H)-one                     | HMDB0249616 |
| 198.03275 | 198.03273 | 0.10099 | C <sub>9</sub> H <sub>10</sub> ClNO <sub>2</sub>             | [M-H] <sup>-</sup>  | (2S)-2-(4-Chloroanilino)propanoic acid                   | HMDB0243595 |
| 198.03275 | 198.03273 | 0.10099 | C <sub>9</sub> H <sub>9</sub> NO <sub>2</sub>                | [M+Cl] <sup>-</sup> | 6-Hydroxy-3,4-dihydro-2(1H)-quinolinone                  | HMDB0246939 |
| 198.03275 | 198.03273 | 0.10099 | C <sub>9</sub> H <sub>10</sub> ClNO <sub>2</sub>             | [M-H] <sup>-</sup>  | 4-Chloro-L-phenylalanine                                 | HMDB0244605 |
| 213.01718 | 213.01714 | 0.18778 | C <sub>6</sub> H <sub>11</sub> ClO <sub>6</sub>              | [M-H] <sup>-</sup>  | Glucose chloride                                         | HMDB0252774 |
| 213.01718 | 213.01714 | 0.18778 | C <sub>6</sub> H <sub>10</sub> O <sub>6</sub>                | [M+Cl] <sup>-</sup> | Gluconolactone                                           | HMDB0000150 |
| 215.03283 | 215.03279 | 0.18602 | C <sub>6</sub> H <sub>12</sub> O <sub>6</sub>                | [M+Cl] <sup>-</sup> | Glucose*†‡                                               | HMDB0304632 |
| 217.02988 | 217.03016 | 1.29014 | C <sub>6</sub> H <sub>12</sub> O <sub>6</sub>                | [M+Cl] <sup>-</sup> | Glucose*†‡                                               | HMDB0304632 |
| 221.01235 | 221.01233 | 0.09049 | C <sub>10</sub> H <sub>6</sub> N <sub>2</sub> O <sub>2</sub> | [M+Cl] <sup>-</sup> | Tyrphostin 23*                                           | HMDB0259354 |
| 243.06228 | 243.06226 | 0.08228 | C <sub>9</sub> H <sub>12</sub> N <sub>2</sub> O <sub>6</sub> | [M-H] <sup>-</sup>  | Uridine*                                                 | HMDB0000296 |
| 243.06228 | 243.06226 | 0.08228 | C <sub>9</sub> H <sub>12</sub> N <sub>2</sub> O <sub>6</sub> | [M-H] <sup>-</sup>  | Pseudouridine*                                           | HMDB0000767 |
| 257.05464 | 257.05459 | 0.19451 | C <sub>7</sub> H <sub>14</sub> N <sub>2</sub> O <sub>6</sub> | [M+Cl] <sup>-</sup> | beta-D-Glucopyranosylurea*†‡                             | HMDB0249119 |
| 257.05464 | 257.05459 | 0.19451 | C <sub>7</sub> H <sub>14</sub> N <sub>2</sub> O <sub>6</sub> | [M+Cl] <sup>-</sup> | Glucosamine, N-carbamoyl-(6Cl)                           | HMDB0248482 |

|           |           |         |                                                                             |                     |                                                                 |             |
|-----------|-----------|---------|-----------------------------------------------------------------------------|---------------------|-----------------------------------------------------------------|-------------|
| 263.10374 | 263.10373 | 0.03801 | C <sub>13</sub> H <sub>16</sub> N <sub>2</sub> O <sub>4</sub>               | [M-H] <sup>-</sup>  | Phenylacetyl glutamate                                          | HMDB0256432 |
| 263.10374 | 263.10373 | 0.03801 | C <sub>13</sub> H <sub>16</sub> N <sub>2</sub> O <sub>4</sub>               | [M-H] <sup>-</sup>  | N(2)-phenylacetyl-L-glutamate                                   | HMDB0062645 |
| 263.10374 | 263.10373 | 0.03801 | C <sub>13</sub> H <sub>16</sub> N <sub>2</sub> O <sub>4</sub>               | [M-H] <sup>-</sup>  | di-Hydroxymelatonin*                                            | HMDB0061136 |
| 263.10374 | 263.10373 | 0.03801 | C <sub>13</sub> H <sub>16</sub> N <sub>2</sub> O <sub>4</sub>               | [M-H] <sup>-</sup>  | Phenylacetylglutamine*                                          | HMDB0006344 |
| 263.10374 | 263.10373 | 0.03801 | C <sub>13</sub> H <sub>16</sub> N <sub>2</sub> O <sub>4</sub>               | [M-H] <sup>-</sup>  | Acetyl-N-formyl-5-methoxykynurenamine*                          | HMDB0004259 |
| 269.05436 | 269.05434 | 0.07433 | C <sub>12</sub> H <sub>9</sub> F <sub>3</sub> N <sub>2</sub> O <sub>2</sub> | [M-H] <sup>-</sup>  | Leflunomide*†‡                                                  | HMDB0015229 |
| 274.10451 | 274.10446 | 0.18241 | C <sub>10</sub> H <sub>17</sub> N <sub>3</sub> O <sub>6</sub>               | [M-H] <sup>-</sup>  | N-gamma-Glutamylglutamine                                       | HMDB0029147 |
| 274.10451 | 274.10446 | 0.18241 | C <sub>10</sub> H <sub>17</sub> N <sub>3</sub> O <sub>6</sub>               | [M-H] <sup>-</sup>  | N2-gamma-Glutamylglutamine                                      | HMDB0011738 |
| 279.91787 | 279.91784 | 0.10717 | C <sub>2</sub> HF <sub>6</sub> NO <sub>4</sub> S <sub>2</sub>               | [M-H] <sup>-</sup>  | 1,1,1-Trifluoro-N-((trifluoromethyl)sulfonyl)methanesulfonamide | HMDB0247493 |
| 295.12409 | 295.12407 | 0.06777 | C <sub>21</sub> H <sub>16</sub> N <sub>2</sub>                              | [M-H] <sup>-</sup>  | 2,4,5-Triphenylimidazole                                        | HMDB0245477 |
| 321.13442 | 321.13436 | 0.18684 | C <sub>17</sub> H <sub>22</sub> O <sub>6</sub>                              | [M-H] <sup>-</sup>  | 2-Hydroxyphenylacetic acid glucuronide*†‡                       | HMDB0240440 |
| 325.12275 | 325.12275 | 0.00000 | C <sub>15</sub> H <sub>22</sub> N <sub>2</sub> O <sub>4</sub> S             | [M-H] <sup>-</sup>  | Hydroxyhexamide                                                 | HMDB0060610 |
| 325.12275 | 325.12275 | 0.00000 | C <sub>15</sub> H <sub>22</sub> N <sub>2</sub> O <sub>4</sub> S             | [M-H] <sup>-</sup>  | N-(N-Acetylmethionyl)dopamine*†                                 | HMDB0244495 |
| 339.17325 | 339.17325 | 0.00000 | C <sub>19</sub> H <sub>28</sub> O <sub>3</sub>                              | [M+Cl] <sup>-</sup> | 19-Hydroxytestosterone*†                                        | HMDB0006769 |
| 339.17325 | 339.17325 | 0.00000 | C <sub>19</sub> H <sub>28</sub> O <sub>3</sub>                              | [M+Cl] <sup>-</sup> | 6beta-Hydroxytestosterone*†                                     | HMDB0006259 |
| 349.14592 | 349.14587 | 0.14321 | C <sub>23</sub> H <sub>18</sub> N <sub>4</sub>                              | [M-H] <sup>-</sup>  | Sibopirdine                                                     | HMDB0258286 |
| 369.17412 | 369.17412 | 0.00000 | C <sub>19</sub> H <sub>30</sub> O <sub>5</sub> S                            | [M-H] <sup>-</sup>  | 5a-Dihydrotestosterone sulfate*†‡                               | HMDB0006278 |
| 369.17412 | 369.17412 | 0.00000 | C <sub>19</sub> H <sub>30</sub> O <sub>5</sub> S                            | [M-H] <sup>-</sup>  | Epiandrosterone sulfate*                                        | HMDB0062657 |
| 377.08563 | 377.08561 | 0.05304 | C <sub>12</sub> H <sub>22</sub> O <sub>11</sub>                             | [M+Cl] <sup>-</sup> | Alpha-Lactose                                                   | HMDB0000186 |
| 377.08563 | 377.08561 | 0.05304 | C <sub>12</sub> H <sub>22</sub> O <sub>11</sub>                             | [M+Cl] <sup>-</sup> | beta-Lactose                                                    | HMDB0041627 |
| 377.08563 | 377.08561 | 0.05304 | C <sub>12</sub> H <sub>22</sub> O <sub>11</sub>                             | [M+Cl] <sup>-</sup> | Maltulose                                                       | HMDB0029919 |
| 383.13801 | 383.13792 | 0.23490 | C <sub>18</sub> H <sub>24</sub> N <sub>2</sub> O <sub>5</sub>               | [M+Cl] <sup>-</sup> | Enalaprilat                                                     | HMDB0041886 |
| 387.09645 | 387.09645 | 0.00000 | C <sub>16</sub> H <sub>20</sub> N <sub>2</sub> O <sub>7</sub>               | [M+Cl] <sup>-</sup> | Cotinine glucuronide*†                                          | HMDB0001013 |
| 480.14038 | 480.14038 | 0.00000 | C <sub>19</sub> H <sub>23</sub> N <sub>7</sub> O <sub>6</sub>               | [M+Cl] <sup>-</sup> | Tetrahydrofolic acid                                            | HMDB0001846 |

\* Metabolites validated by LC-MS/MS, † Differential metabolites in ADs vs HC, ‡ Differential metabolites in SS vs AS vs SLE vs RA vs HC.

**Table S8** 12 identified differential metabolites of autoimmune diseases versus healthy controls (ADs vs HC) in urine samples.

| Compounds                       | m/z      | Adduct              | VIP score | p value  | Fold change | Regulated |
|---------------------------------|----------|---------------------|-----------|----------|-------------|-----------|
| Ribonic acid                    | 165.0405 | [M-H] <sup>-</sup>  | 1.4296    | 7.58E-11 | 2.1822      | ↑         |
| Urate radical                   | 166.0133 | [M-H] <sup>-</sup>  | 1.9023    | 1.29E-20 | 3.8919      | ↑         |
| Ascorbic acid                   | 175.0248 | [M-H] <sup>-</sup>  | 2.1170    | 1.68E-25 | 11.3570     | ↑         |
| 2-O-Methylascorbic acid         | 189.0405 | [M-H] <sup>-</sup>  | 1.6618    | 2.74E-09 | 4.4211      | ↑         |
| D-Glucuronic acid               | 193.0354 | [M-H] <sup>-</sup>  | 1.4223    | 4.89E-12 | 2.6535      | ↑         |
| Uridine                         | 243.0622 | [M-H] <sup>-</sup>  | 1.5279    | 1.25E-10 | 5.3296      | ↑         |
| Phenylacetylglutamine           | 263.1038 | [M-H] <sup>-</sup>  | 1.1046    | 3.77E-08 | 2.1653      | ↑         |
| beta-D-3-Ribofuranosyluric acid | 299.0635 | [M-H] <sup>-</sup>  | 1.5532    | 7.87E-10 | 16.9510     | ↑         |
| N-Acetylneuraminic acid         | 308.0988 | [M-H] <sup>-</sup>  | 1.3626    | 2.07E-09 | 30.1490     | ↑         |
| N4-Acetylcytidine               | 320.0655 | [M+Cl] <sup>-</sup> | 1.1119    | 1.56E-04 | 6.6094      | ↑         |
| Androsterone sulfate            | 369.1741 | [M-H] <sup>-</sup>  | 1.0906    | 2.76E-05 | 0.4207      | ↓         |
| Androsterone glucuronide        | 465.2494 | [M-H] <sup>-</sup>  | 1.3211    | 7.82E-06 | 0.1614      | ↓         |

**Table S9** 6 identified differential metabolites of autoimmune diseases versus healthy controls (ADs vs HC) in serum samples.

| Compounds                      | m/z      | Adduct              | VIP score | p value  | Fold change | Regulated |
|--------------------------------|----------|---------------------|-----------|----------|-------------|-----------|
| beta-D-Glucopyranosylurea      | 257.0546 | [M+Cl] <sup>-</sup> | 1.6699    | 2.24E-10 | 0.4425      | ↓         |
| Leflunomide                    | 269.0544 | [M-H] <sup>-</sup>  | 1.5760    | 3.50E-05 | 6.3021      | ↑         |
| N-(N-Acetylmethionyl)dopamine  | 325.1228 | [M-H] <sup>-</sup>  | 1.0814    | 7.81E-03 | 2.0098      | ↑         |
| Hydroxytestosterone            | 339.1733 | [M+Cl] <sup>-</sup> | 1.2576    | 2.35E-03 | 2.0608      | ↑         |
| 5a-Dihydrotestosterone sulfate | 369.1741 | [M-H] <sup>-</sup>  | 2.1484    | 9.30E-17 | 0.3728      | ↓         |
| Cotinine glucuronide           | 387.0965 | [M+Cl] <sup>-</sup> | 1.4424    | 8.37E-05 | 2.4506      | ↑         |

**Table S10** Metrics of classifiers for individual autoimmune diseases (ADs) versus healthy controls (HC) with urine samples.

|           | Model                  | AUC   | Accuracy | F1    | Precision | Recall |
|-----------|------------------------|-------|----------|-------|-----------|--------|
| RA vs HC  | Random Forest          | 0.990 | 0.946    | 0.946 | 0.947     | 0.946  |
|           | Neural Network         | 0.979 | 0.968    | 0.968 | 0.968     | 0.968  |
|           | Logistic Regression    | 0.977 | 0.927    | 0.927 | 0.932     | 0.927  |
|           | Support Vector Machine | 0.963 | 0.874    | 0.873 | 0.878     | 0.874  |
|           | k-Nearest Neighbor     | 0.945 | 0.868    | 0.868 | 0.873     | 0.868  |
|           | AdaBoost               | 0.935 | 0.935    | 0.935 | 0.936     | 0.935  |
|           | Naive Bayes            | 0.898 | 0.823    | 0.819 | 0.848     | 0.823  |
| SLE vs HC | Random Forest          | 0.990 | 0.947    | 0.947 | 0.948     | 0.947  |
|           | Naive Bayes            | 0.983 | 0.921    | 0.921 | 0.921     | 0.921  |
|           | Logistic Regression    | 0.971 | 0.877    | 0.877 | 0.881     | 0.877  |
|           | Neural Network         | 0.962 | 0.939    | 0.939 | 0.939     | 0.939  |
|           | Support Vector Machine | 0.960 | 0.886    | 0.885 | 0.896     | 0.886  |
|           | k-Nearest Neighbor     | 0.923 | 0.842    | 0.842 | 0.843     | 0.842  |
|           | AdaBoost               | 0.851 | 0.851    | 0.851 | 0.851     | 0.851  |
| AS vs HC  | Neural Network         | 0.998 | 0.979    | 0.979 | 0.980     | 0.979  |
|           | Logistic Regression    | 0.953 | 0.875    | 0.875 | 0.878     | 0.875  |
|           | Random Forest          | 0.942 | 0.875    | 0.875 | 0.878     | 0.875  |
|           | Naive Bayes            | 0.920 | 0.812    | 0.812 | 0.817     | 0.812  |
|           | k-Nearest Neighbor     | 0.871 | 0.771    | 0.770 | 0.775     | 0.771  |
|           | AdaBoost               | 0.854 | 0.854    | 0.854 | 0.855     | 0.854  |
|           | Support Vector Machine | 0.842 | 0.812    | 0.812 | 0.813     | 0.812  |
| SS vs HC  | Neural Network         | 0.952 | 0.952    | 0.952 | 0.957     | 0.952  |
|           | Random Forest          | 0.952 | 0.881    | 0.881 | 0.882     | 0.881  |
|           | Logistic Regression    | 0.898 | 0.833    | 0.831 | 0.853     | 0.833  |
|           | AdaBoost               | 0.881 | 0.881    | 0.881 | 0.882     | 0.881  |
|           | Support Vector Machine | 0.859 | 0.714    | 0.704 | 0.751     | 0.714  |
|           | Naive Bayes            | 0.828 | 0.786    | 0.783 | 0.803     | 0.786  |
|           | k-Nearest Neighbor     | 0.734 | 0.667    | 0.664 | 0.673     | 0.667  |

RA: rheumatoid arthritis, SLE: systemic lupus erythematosus, AS: ankylosing spondylitis, SS: sicca syndrome.

**Table S11** Metrics of classifiers for individual autoimmune diseases (ADs) versus healthy controls (HC) with serum samples.

|           | Model                  | AUC   | Accuracy | F1    | Precision | Recall |
|-----------|------------------------|-------|----------|-------|-----------|--------|
| RA vs HC  | Neural Network         | 0.989 | 0.954    | 0.954 | 0.954     | 0.954  |
|           | Support Vector Machine | 0.987 | 0.938    | 0.938 | 0.939     | 0.938  |
|           | Logistic Regression    | 0.967 | 0.892    | 0.892 | 0.893     | 0.892  |
|           | Random Forest          | 0.962 | 0.892    | 0.892 | 0.893     | 0.892  |
|           | Naive Bayes            | 0.911 | 0.817    | 0.817 | 0.818     | 0.817  |
|           | k-Nearest Neighbor     | 0.853 | 0.758    | 0.758 | 0.760     | 0.758  |
|           | AdaBoost               | 0.833 | 0.833    | 0.833 | 0.833     | 0.833  |
| SLE vs HC | Neural Network         | 0.998 | 0.974    | 0.974 | 0.974     | 0.974  |
|           | Logistic Regression    | 0.997 | 0.965    | 0.965 | 0.965     | 0.965  |
|           | Support Vector Machine | 0.997 | 0.965    | 0.965 | 0.967     | 0.965  |
|           | Random Forest          | 0.991 | 0.956    | 0.956 | 0.956     | 0.956  |
|           | Naive Bayes            | 0.973 | 0.912    | 0.912 | 0.921     | 0.912  |
|           | k-Nearest Neighbor     | 0.923 | 0.842    | 0.842 | 0.846     | 0.842  |
|           | AdaBoost               | 0.921 | 0.921    | 0.921 | 0.924     | 0.921  |
| AS vs HC  | Logistic Regression    | 0.991 | 0.958    | 0.958 | 0.958     | 0.958  |
|           | Neural Network         | 0.979 | 0.938    | 0.937 | 0.938     | 0.938  |
|           | Support Vector Machine | 0.964 | 0.875    | 0.875 | 0.878     | 0.875  |
|           | Random Forest          | 0.919 | 0.812    | 0.812 | 0.813     | 0.812  |
|           | AdaBoost               | 0.917 | 0.917    | 0.917 | 0.920     | 0.917  |
|           | Naive Bayes            | 0.891 | 0.792    | 0.791 | 0.794     | 0.792  |
|           | k-Nearest Neighbor     | 0.783 | 0.750    | 0.750 | 0.752     | 0.75   |
| SS vs HC  | Neural Network         | 0.989 | 0.905    | 0.905 | 0.905     | 0.905  |
|           | Support Vector Machine | 0.927 | 0.857    | 0.857 | 0.860     | 0.857  |
|           | Logistic Regression    | 0.902 | 0.810    | 0.809 | 0.812     | 0.81   |
|           | Naive Bayes            | 0.891 | 0.833    | 0.833 | 0.834     | 0.833  |
|           | Random Forest          | 0.866 | 0.833    | 0.833 | 0.834     | 0.833  |
|           | k-Nearest Neighbor     | 0.807 | 0.714    | 0.714 | 0.714     | 0.714  |
|           | AdaBoost               | 0.714 | 0.714    | 0.714 | 0.714     | 0.714  |

RA: rheumatoid arthritis, SLE: systemic lupus erythematosus, AS: ankylosing spondylitis, SS: sicca syndrome.

**Table S12** Metrics of Neural Network for different classification models with urine samples.

| Classification        | AUC   | Accuracy | F1    | Precision | Recall |
|-----------------------|-------|----------|-------|-----------|--------|
| SLE vs RA             | 0.976 | 0.947    | 0.947 | 0.947     | 0.947  |
| AS vs RA              | 0.995 | 0.938    | 0.937 | 0.938     | 0.938  |
| SS vs RA              | 0.939 | 0.881    | 0.881 | 0.882     | 0.881  |
| OT (5) vs RA          | 0.956 | 0.885    | 0.885 | 0.885     | 0.885  |
| OT (5) vs RA vs HC    | 0.971 | 0.906    | 0.906 | 0.906     | 0.906  |
| SS vs AS vs SLE vs RA | 0.953 | 0.845    | 0.845 | 0.845     | 0.845  |

SLE: systemic lupus erythematosus, RA: rheumatoid arthritis, AS: ankylosing spondylitis, SS: sicca syndrome, OT: other autoimmune diseases (SLE, AS, SS, SSc: systemic scleroderma, CTD: connective tissue disease).

**Table S13** Metrics of Neural Network for different classification models with serum samples.

| Classification        | AUC   | Accuracy | F1    | Precision | Recall |
|-----------------------|-------|----------|-------|-----------|--------|
| SLE vs RA             | 0.987 | 0.921    | 0.921 | 0.921     | 0.921  |
| AS vs RA              | 0.934 | 0.896    | 0.896 | 0.897     | 0.896  |
| SS vs RA              | 0.995 | 0.952    | 0.952 | 0.952     | 0.952  |
| OT (5) vs RA          | 0.863 | 0.774    | 0.773 | 0.774     | 0.774  |
| OT (5) vs RA vs HC    | 0.947 | 0.832    | 0.833 | 0.834     | 0.832  |
| SS vs AS vs SLE vs RA | 0.873 | 0.679    | 0.680 | 0.685     | 0.679  |

SLE: systemic lupus erythematosus, RA: rheumatoid arthritis, AS: ankylosing spondylitis, SS: sicca syndrome, OT: other autoimmune diseases (SLE, AS, SS, SSc: systemic scleroderma, CTD: connective tissue disease).

**Table S14** Metrics of classifiers for the distinction of four autoimmune diseases (ADs) and healthy controls (HC) with urine samples.

| Model                  | AUC   | Accuracy | F1    | Precision | Recall |
|------------------------|-------|----------|-------|-----------|--------|
| Neural Network         | 0.984 | 0.914    | 0.915 | 0.918     | 0.914  |
| Logistic Regression    | 0.913 | 0.733    | 0.729 | 0.736     | 0.733  |
| Naive Bayes            | 0.907 | 0.705    | 0.702 | 0.741     | 0.705  |
| Support Vector Machine | 0.903 | 0.657    | 0.671 | 0.739     | 0.657  |
| Random Forest          | 0.884 | 0.676    | 0.675 | 0.680     | 0.676  |
| k-Nearest Neighbor     | 0.847 | 0.438    | 0.438 | 0.440     | 0.438  |
| AdaBoost               | 0.815 | 0.705    | 0.706 | 0.714     | 0.705  |

SS vs AS vs SLE vs RA vs HC, SS: sicca syndrome, AS: ankylosing spondylitis, SLE: systemic lupus erythematosus, RA: rheumatoid arthritis.



**Table S15** Metrics of classifiers for the distinction of four autoimmune diseases (ADs) and healthy controls (HC) with serum samples.

| Model                  | AUC   | Accuracy | F1    | Precision | Recall |
|------------------------|-------|----------|-------|-----------|--------|
| Neural Network         | 0.924 | 0.714    | 0.713 | 0.713     | 0.714  |
| Support Vector Machine | 0.891 | 0.667    | 0.666 | 0.669     | 0.667  |
| Logistic Regression    | 0.861 | 0.629    | 0.630 | 0.634     | 0.629  |
| Random Forest          | 0.788 | 0.505    | 0.488 | 0.479     | 0.505  |
| Naive Bayes            | 0.775 | 0.419    | 0.379 | 0.403     | 0.419  |
| AdaBoost               | 0.708 | 0.533    | 0.547 | 0.565     | 0.533  |
| k-Nearest Neighbor     | 0.629 | 0.267    | 0.274 | 0.295     | 0.267  |

SS vs AS vs SLE vs RA vs HC, SS: sicca syndrome, AS: ankylosing spondylitis, SLE: systemic lupus erythematosus, RA: rheumatoid arthritis.

**Table S16** Metrics of classifiers for the distinction of four autoimmune diseases (ADs) and healthy controls (HC) with fusion model.

| Model                  | AUC   | Accuracy | F1    | Precision | Recall |
|------------------------|-------|----------|-------|-----------|--------|
| Neural Network         | 0.965 | 0.838    | 0.836 | 0.837     | 0.838  |
| Logistic Regression    | 0.958 | 0.829    | 0.829 | 0.828     | 0.829  |
| Support Vector Machine | 0.943 | 0.771    | 0.776 | 0.794     | 0.771  |
| Naive Bayes            | 0.936 | 0.752    | 0.749 | 0.774     | 0.752  |
| Random Forest          | 0.908 | 0.714    | 0.713 | 0.718     | 0.714  |
| AdaBoost               | 0.780 | 0.648    | 0.643 | 0.642     | 0.648  |
| k-Nearest Neighbor     | 0.765 | 0.381    | 0.375 | 0.437     | 0.381  |

SS vs AS vs SLE vs RA vs HC, SS: sicca syndrome, AS: ankylosing spondylitis, SLE: systemic lupus erythematosus, RA: rheumatoid arthritis.

**Table S17** 19 identified characteristic metabolites in the distinction of four autoimmune diseases (ADs) and healthy controls (HC) with urine samples.

| Compounds                                                                   | m/z      | Adduct              | f value | p value  | Fisher's LSD                                            |
|-----------------------------------------------------------------------------|----------|---------------------|---------|----------|---------------------------------------------------------|
| Ribonic acid                                                                | 165.0405 | [M-H] <sup>-</sup>  | 6.0610  | 2.16E-03 | AS - HC; AS - RA; AS - SLE; SS - HC; SS - RA; SS - SLE  |
| Urate radical                                                               | 166.0133 | [M-H] <sup>-</sup>  | 5.3418  | 4.21E-03 | AS - HC; AS - RA; AS - SLE; SS - HC; SS - RA; SS - SLE  |
| Dehydroascorbic acid                                                        | 173.0092 | [M-H] <sup>-</sup>  | 4.4279  | 9.12E-03 | AS - HC; SLE - HC; SS - HC; SLE - RA; SS - RA           |
| Ascorbic acid                                                               | 175.0248 | [M-H] <sup>-</sup>  | 7.3539  | 8.90E-04 | AS - HC; AS - SLE; RA - HC; SS - HC; SS - RA; SS - SLE  |
| p-Cresol sulfate                                                            | 187.0071 | [M-H] <sup>-</sup>  | 3.3924  | 2.83E-02 | HC - AS; RA - AS; SLE - AS                              |
| 2-O-Methylascorbic acid                                                     | 189.0405 | [M-H] <sup>-</sup>  | 3.6419  | 2.15E-02 | SS - AS; SS - HC; SS - RA; SS - SLE                     |
| D-Glucuronic acid                                                           | 193.0354 | [M-H] <sup>-</sup>  | 6.8060  | 1.07E-03 | AS - HC; AS - RA; AS - SLE; SS - RA; SS - SLE           |
| 3-Hydroxyhippuric acid                                                      | 194.0459 | [M-H] <sup>-</sup>  | 4.6607  | 7.34E-03 | SS - AS; SS - HC; SS - RA; SS - SLE                     |
| Gluconic acid                                                               | 195.0511 | [M-H] <sup>-</sup>  | 10.1100 | 5.36E-05 | AS - HC; AS - RA; SS - AS; SS - HC; SS - RA; SS - SLE   |
| Indoxyl sulfate                                                             | 212.0023 | [M-H] <sup>-</sup>  | 6.0193  | 2.16E-03 | SS - AS; SLE - HC; SS - HC; SLE - RA; SS - RA           |
| Uridine                                                                     | 243.0622 | [M-H] <sup>-</sup>  | 5.7487  | 2.57E-03 | AS - RA; SS - AS; SS - HC; SS - RA; SS - SLE            |
| Phenylacetylglutamine                                                       | 263.1038 | [M-H] <sup>-</sup>  | 5.0258  | 6.11E-03 | SLE - AS; SS - AS; SLE - HC; SS - HC                    |
| beta-D-3-Ribofuranosyluric acid                                             | 299.0635 | [M-H] <sup>-</sup>  | 3.8230  | 1.75E-02 | SS - HC; SS - RA                                        |
| N-Acetylneuraminic acid                                                     | 308.0988 | [M-H] <sup>-</sup>  | 4.1423  | 1.19E-02 | SS - HC; SS - RA; SS - SLE                              |
| N4-Acetylcytidine                                                           | 320.0655 | [M+Cl] <sup>-</sup> | 3.5744  | 2.32E-02 | SS - AS; SS - HC; SS - RA; SS - SLE                     |
| 5-(3',5'-Dihydroxyphenyl)-gamma-valerolactone-O-glucuronide-O-methyl        | 397.1143 | [M-H] <sup>-</sup>  | 3.5495  | 2.38E-02 | HC - AS; HC - SS                                        |
| 5-(3',4',5'-trihydroxyphenyl)-gamma-valerolactone-O-methyl-4'-O-glucuronide | 413.1088 | [M-H] <sup>-</sup>  | 3.2335  | 3.28E-02 | HC - AS; HC - RA; HC - SLE                              |
| Androsterone glucuronide                                                    | 465.2494 | [M-H] <sup>-</sup>  | 4.3718  | 9.67E-03 | HC - AS; HC - RA; HC - SLE; HC - SS                     |
| Cortolone-3-glucuronide                                                     | 541.2654 | [M-H] <sup>-</sup>  | 3.7811  | 1.84E-02 | AS - RA; AS - SLE; HC - RA; HC - SLE; SS - RA; SS - SLE |

Fisher's LSD: Fisher's least significant difference, AS: ankylosing spondylitis, RA: rheumatoid arthritis, SLE: systemic lupus erythematosus, SS: sicca syndrome.

**Table S18 9** identified characteristic metabolites in the distinction of four autoimmune diseases (ADs) and healthy controls (HC) with serum samples.

| Compounds                              | m/z      | Adduct  | f value | p value  | Fisher's LSD                                                     |
|----------------------------------------|----------|---------|---------|----------|------------------------------------------------------------------|
| Urate radical                          | 166.0133 | [M-H]-  | 3.8793  | 2.90E-02 | SLE - AS; SLE - HC; SLE - RA; SLE - SS                           |
| Phenol sulphate                        | 172.9914 | [M-H]-  | 3.4794  | 4.31E-02 | SLE - AS; SLE - HC; SLE - RA; SLE - SS                           |
| 1-(1-Naphthyl)ethylenediamine          | 185.1085 | [M-H]-  | 4.9989  | 9.08E-03 | RA - AS; RA - SLE; RA - SS                                       |
| Citric acid                            | 191.0198 | [M-H]-  | 5.4818  | 4.88E-03 | SLE - AS; SLE - HC; SLE - RA; SLE - SS                           |
| Glucose                                | 215.0328 | [M+Cl]- | 7.8134  | 3.37E-04 | HC - AS; RA - AS; AS - SLE; HC - SLE; HC - SS; RA - SLE; RA - SS |
| beta-D-Glucopyranosylurea              | 257.0546 | [M+Cl]- | 9.2433  | 7.37E-05 | HC - AS; RA - AS; HC - RA; HC - SLE; HC - SS; RA - SLE           |
| Leflunomide                            | 269.0544 | [M-H]-  | 4.5383  | 1.58E-02 | RA - AS; SLE - AS; RA - HC; SLE - HC                             |
| 2-Hydroxyphenylacetic acid glucuronide | 321.1344 | [M-H]-  | 8.1178  | 2.49E-04 | AS - HC; AS - SLE; RA - HC; SS - HC; RA - SLE; SS - SLE          |
| 5a-Dihydrotestosterone sulfate         | 369.1741 | [M-H]-  | 5.4461  | 4.88E-03 | AS - SLE; AS - SS; HC - RA; HC - SLE; HC - SS                    |

Fisher's LSD: Fisher's least significant difference, AS: ankylosing spondylitis, RA: rheumatoid arthritis, SLE: systemic lupus erythematosus, SS: sicca syndrome.

## References

1. J. Demsar, G. Leban and B. Zupan, *Journal of Biomedical Informatics*, 2007, **40**, 661-671.
2. H. Zhang, L. Zhao, J. Jiang, J. Zheng, L. Yang, Y. Li, J. Zhou, T. Liu, J. Xu, W. Lou, W. Yang, L. Tan, W. Liu, Y. Yu, M. Ji, Y. Xu, Y. Lu, X. Li, Z. Liu, R. Tian, C. Hu, S. Zhang, Q. Hu, Y. Deng, H. Ying, S. Zhong, X. Zhang, Y. Wang, H. Wang, J. Bai, X. Li and X. Duan, *Nat Commun*, 2022, **13**, 617.
